# Supplementary material for: Unusual π–π interactions directed by the [{(C6H6)Ru}2W8O30(OH)2]6− hybrid anion
Source: Royal Society of Chemistry journal article supplement (doi:10.1039/d1ce00319d), 2021-01-01
Supplement: d1ce00319d2.pdf [file d1ce00319d2.pdf]

# Unusual $\pi$ - $\pi$ interactions directed by

## $[\{(C_6H_6)Ru\}_2W_8O_{30}(OH)_2]^{6-}$ hybrid anion

*Anna A. Mukhacheva<sup>†</sup>, Vladislav Yu. Komarov<sup>†</sup>, Vasily V. Kokovkin<sup>†</sup>, Alexander Novikov<sup>‡</sup>, Pavel*

*A. Abramov<sup>\*†,§</sup>, Maxim N. Sokolov<sup>†</sup>*

### Supporting information

#### Table of contents

|                                                                                                                                                                                                                                                                                                                                                                                                                                                                                                                                                                                                  |    |
|--------------------------------------------------------------------------------------------------------------------------------------------------------------------------------------------------------------------------------------------------------------------------------------------------------------------------------------------------------------------------------------------------------------------------------------------------------------------------------------------------------------------------------------------------------------------------------------------------|----|
| <b>Table S1.</b> Experimental details .....                                                                                                                                                                                                                                                                                                                                                                                                                                                                                                                                                      | 3  |
| <b>Table S2.</b> Selected geometric parameters (Å) .....                                                                                                                                                                                                                                                                                                                                                                                                                                                                                                                                         | 5  |
| <b>Figure S1.</b> Location of polyanions (a) in the plane of the layer and (b) in adjacent layers in structures of type A. The gray dotted line marks the shortest distances O... O. Green dotted line - contacts edge C <sub>6</sub> H <sub>6</sub> ...O, red - plane C <sub>6</sub> H <sub>6</sub> ...O.....                                                                                                                                                                                                                                                                                   | 7  |
| <b>Figure S2.</b> Location of polyanions (a) in the plane of the layer and (b) the nearest in adjacent layers in structures of type B. Gray dotted line marks the shortest distances O... O. Green dotted line - contacts edge C <sub>6</sub> H <sub>6</sub> ...O, red - plane C <sub>6</sub> H <sub>6</sub> ...O.....                                                                                                                                                                                                                                                                           | 8  |
| <b>Figure S3.</b> Relative location of anionic and water-cationic layers in structures of type A. ....                                                                                                                                                                                                                                                                                                                                                                                                                                                                                           | 9  |
| <b>Figure S4.</b> Arrangement of Na <sup>+</sup> coordination chains relative to polyanionic layers in structures <b>5</b> and <b>3</b> . (a) general view along the direction of the chains, (b, c) - view perpendicular to the direction of layers and chains for <b>5</b> and <b>3</b> , respectively, (d, e) - coordination structure of single cationic chains for <b>5</b> and <b>3</b> , respectively. Green balls show Na atoms, red - coordinated water molecules, pink - oxygen atoms of polyanions. The belonging of oxygen atoms to one polyanion is shown by blue dashed lines..... | 10 |
| <b>Fig. S1.</b> Layers of hydrated Na <sup>+</sup> cations in the crystal structure of <b>2</b> . ....                                                                                                                                                                                                                                                                                                                                                                                                                                                                                           | 11 |
| <b>Fig. S2.</b> Pseudo layered packing of POM hybrid anions in the crystal structure of <b>2</b> . ....                                                                                                                                                                                                                                                                                                                                                                                                                                                                                          | 12 |
| <b>Fig. S3.</b> Crimped pseudo layers of hydrated sodium cations in the crystal structure of <b>3</b> . ....                                                                                                                                                                                                                                                                                                                                                                                                                                                                                     | 13 |
| <b>Fig. S4.</b> Crimped pseudo layers of hydrated sodium cations in the crystal structure of <b>3</b> . ....                                                                                                                                                                                                                                                                                                                                                                                                                                                                                     | 14 |
| <b>Fig. S5.</b> Crimped pseudo layers of hydrated sodium cations in the crystal structure of <b>5</b> . ....                                                                                                                                                                                                                                                                                                                                                                                                                                                                                     | 15 |

|                                                                                                                                                                                                                                                                |    |
|----------------------------------------------------------------------------------------------------------------------------------------------------------------------------------------------------------------------------------------------------------------|----|
| <b>Fig. S6.</b> Crimped pseudo layers of hydrated sodium cations in the crystal structure of <b>5</b> . .....                                                                                                                                                  | 16 |
| <b>Fig. S7.</b> Crystal packing of <b>6</b> . .....                                                                                                                                                                                                            | 17 |
| BVS part .....                                                                                                                                                                                                                                                 | 18 |
| <b>Table S3.</b> Cartesian atomic coordinates for model structures .....                                                                                                                                                                                       | 23 |
| <b>Fig. S8.</b> Cathodic region of CV (an aqueous solution of <b>1 C</b> = 0.008 M) in 0.5 M $\text{Li}_2\text{SO}_4$ at a scan rate of 10 mV/s with the addition of 100 $\mu\text{L}$ of methanol at sequential cycling from 1 to 4 (from black to blue)..... | 36 |

**Table S1.** Experimental detailsExperiments were carried out at 150 K with Mo K $\alpha$  radiation. H-atom parameters were constrained.

|                                                                                     | (2)                                                                                                  | (3)                                                                                            | (4)                                                                                                                                                                                                                                | (5)                                                                                                    |
|-------------------------------------------------------------------------------------|------------------------------------------------------------------------------------------------------|------------------------------------------------------------------------------------------------|------------------------------------------------------------------------------------------------------------------------------------------------------------------------------------------------------------------------------------|--------------------------------------------------------------------------------------------------------|
| Chemical formula                                                                    | C <sub>12</sub> H <sub>12</sub> Na <sub>3.80</sub> O <sub>45</sub><br>Ru <sub>2</sub> W <sub>8</sub> | C <sub>12</sub> H <sub>12</sub> Na <sub>6</sub> O <sub>52</sub> Ru <sub>2</sub> W <sub>8</sub> | C <sub>12</sub> H <sub>54</sub> Na <sub>4</sub> O <sub>48.95</sub><br>Ru <sub>2</sub> W <sub>8</sub>                                                                                                                               | C <sub>12</sub> H <sub>12</sub> Na <sub>4.20</sub> O <sub>54.4</sub><br>Ru <sub>2</sub> W <sub>8</sub> |
| $M_r$                                                                               | 2636.52                                                                                              | 2799.10                                                                                        | 2746.65                                                                                                                                                                                                                            | 2796.11                                                                                                |
| Crystal system, space group                                                         | Monoclinic, $P2_1/n$                                                                                 | Monoclinic, $C2/c$                                                                             | Monoclinic, $I2/a$                                                                                                                                                                                                                 | Monoclinic, $C2/c$                                                                                     |
| $a, b, c$ (Å)                                                                       | 10.3129 (4),<br>16.4452 (6),<br>14.8941 (5)                                                          | 25.8211 (11),<br>16.9966 (7),<br>17.3342 (7)                                                   | 20.5086 (8),<br>17.1615 (7),<br>17.3902 (8)                                                                                                                                                                                        | 25.5718 (4),<br>17.0393 (3),<br>17.3183 (3)                                                            |
| $\beta$ (°)                                                                         | 103.446 (2)                                                                                          | 127.743 (1)                                                                                    | 93.080 (4)                                                                                                                                                                                                                         | 127.656 (1)                                                                                            |
| $V$ (Å <sup>3</sup> )                                                               | 2456.77 (16)                                                                                         | 6015.7 (4)                                                                                     | 6111.8 (4)                                                                                                                                                                                                                         | 5974.13 (19)                                                                                           |
| $Z$                                                                                 | 2                                                                                                    | 4                                                                                              | 4                                                                                                                                                                                                                                  | 4                                                                                                      |
| $\mu$ (mm <sup>-1</sup> )                                                           | 19.39                                                                                                | 15.87                                                                                          | 15.60                                                                                                                                                                                                                              | 15.97                                                                                                  |
| Crystal size (mm)                                                                   | 0.46 × 0.09 ×<br>0.02                                                                                | 0.20 × 0.07 ×<br>0.04                                                                          | 0.30 × 0.10 ×<br>0.10                                                                                                                                                                                                              | 0.11 × 0.08 ×<br>0.08                                                                                  |
| Diffractometer                                                                      | Bruker D8<br>Venture                                                                                 | Bruker D8<br>Venture                                                                           | New Xcalibur,<br>AtlasS2                                                                                                                                                                                                           | Bruker D8<br>Venture                                                                                   |
| Absorption correction                                                               | Multi-scan<br><i>SADABS</i><br>(Bruker-AXS,<br>2004)                                                 | Multi-scan<br><i>SADABS</i><br>(Bruker-AXS,<br>2004)                                           | Multi-scan<br><i>CrysAlis PRO</i><br>1.171.38.41<br>(Rigaku Oxford<br>Diffraction,<br>2015) Empirical<br>absorption<br>correction using<br>spherical<br>harmonics,<br>implemented in<br>SCALE3<br>ABSPACK<br>scaling<br>algorithm. | Multi-scan<br><i>SADABS</i><br>(Bruker-AXS,<br>2004)                                                   |
| $T_{\min}, T_{\max}$                                                                | 0.619, 0.746                                                                                         | 0.615, 0.746                                                                                   | 0.315, 1.000                                                                                                                                                                                                                       | 0.537, 0.747                                                                                           |
| No. of measured,<br>independent and<br>observed [ $I > 2\sigma(I)$ ]<br>reflections | 83359, 8082,<br>5083                                                                                 | 59528, 10009,<br>8603                                                                          | 15633, 7178,<br>5973                                                                                                                                                                                                               | 43675, 11281,<br>8655                                                                                  |
| $R_{\text{int}}$                                                                    | 0.201                                                                                                | 0.044                                                                                          | 0.034                                                                                                                                                                                                                              | 0.062                                                                                                  |
| $\theta$ values (°)                                                                 | $\theta_{\max} = 31.5, \theta_{\min}$<br>$= 1.9$                                                     | $\theta_{\max} = 31.5, \theta_{\min}$<br>$= 2.0$                                               | $\theta_{\max} = 29.5, \theta_{\min}$<br>$= 3.3$                                                                                                                                                                                   | $\theta_{\max} = 33.1, \theta_{\min}$<br>$= 2.0$                                                       |
| $(\sin \theta/\lambda)_{\max}$ (Å <sup>-1</sup> )                                   | 0.736                                                                                                | 0.736                                                                                          | 0.693                                                                                                                                                                                                                              | 0.769                                                                                                  |
| Range of $h, k, l$                                                                  | $-15 \leq h \leq 15,$<br>$-24 \leq k \leq 24,$<br>$-21 \leq l \leq 21$                               | $-37 \leq h \leq 37,$<br>$-24 \leq k \leq 24,$<br>$-25 \leq l \leq 25$                         | $-28 \leq h \leq 27,$<br>$-23 \leq k \leq 22,$<br>$-23 \leq l \leq 13$                                                                                                                                                             | $-39 \leq h \leq 38,$<br>$-26 \leq k \leq 26,$<br>$-25 \leq l \leq 26$                                 |
| $R[F^2 > 2\sigma(F^2)],$<br>$wR(F^2), S$                                            | 0.051, 0.129,<br>0.94                                                                                | 0.032, 0.081,<br>1.03                                                                          | 0.037, 0.097,<br>1.06                                                                                                                                                                                                              | 0.040, 0.089,<br>1.07                                                                                  |
| No. of reflections,<br>parameters, restraints                                       | 8082, 330, 0                                                                                         | 10009, 363, 0                                                                                  | 7178, 354, 0                                                                                                                                                                                                                       | 11281, 366, 36                                                                                         |

|                                                             |                                                                           |                                                                                       |                                                                                      |                                                                           |
|-------------------------------------------------------------|---------------------------------------------------------------------------|---------------------------------------------------------------------------------------|--------------------------------------------------------------------------------------|---------------------------------------------------------------------------|
| Weighting scheme                                            | $w = 1/[\sigma^2(F_o^2) + (0.0491P)^2]$<br>where $P = (F_o^2 + 2F_c^2)/3$ | $w = 1/[\sigma^2(F_o^2) + (0.0352P)^2 + 125.0742P]$<br>where $P = (F_o^2 + 2F_c^2)/3$ | $w = 1/[\sigma^2(F_o^2) + (0.0406P)^2 + 99.4997P]$<br>where $P = (F_o^2 + 2F_c^2)/3$ | $w = 1/[\sigma^2(F_o^2) + (0.0335P)^2]$<br>where $P = (F_o^2 + 2F_c^2)/3$ |
| $\Delta\rho_{\max}, \Delta\rho_{\min}$ (e Å <sup>-3</sup> ) | 2.38, -2.98                                                               | 2.94, -1.97                                                                           | 1.91, -2.54                                                                          | 4.38, -2.78                                                               |

|                                                                            |                                                                                                      |
|----------------------------------------------------------------------------|------------------------------------------------------------------------------------------------------|
|                                                                            | (6)                                                                                                  |
| Chemical formula                                                           | C <sub>12</sub> H <sub>12</sub> Na <sub>0.50</sub> O <sub>38.70</sub> Ru <sub>2</sub> W <sub>8</sub> |
| $M_r$                                                                      | 2459.85                                                                                              |
| Crystal system, space group                                                | Monoclinic, <i>C2/c</i>                                                                              |
| $a, b, c$ (Å)                                                              | 24.1881 (7), 18.2571 (6), 16.5476 (6)                                                                |
| $\beta$ (°)                                                                | 125.354 (1)                                                                                          |
| $V$ (Å <sup>3</sup> )                                                      | 5959.9 (3)                                                                                           |
| $Z$                                                                        | 4                                                                                                    |
| $\mu$ (mm <sup>-1</sup> )                                                  | 15.94                                                                                                |
| Crystal size (mm)                                                          | 0.11 × 0.08 × 0.08                                                                                   |
| Diffractometer                                                             | Bruker D8 Venture                                                                                    |
| Absorption correction                                                      | Multi-scan <i>SADABS</i> (Bruker-AXS, 2004)                                                          |
| $T_{\min}, T_{\max}$                                                       | 0.495, 0.745                                                                                         |
| No. of measured, independent and observed [ $I > 2\sigma(I)$ ] reflections | 29760, 6095, 4039                                                                                    |
| $R_{\text{int}}$                                                           | 0.088                                                                                                |
| $\theta$ values (°)                                                        | $\theta_{\max} = 26.4, \theta_{\min} = 2.1$                                                          |
| $(\sin \theta/\lambda)_{\max}$ (Å <sup>-1</sup> )                          | 0.625                                                                                                |
| Range of $h, k, l$                                                         | $-30 \leq h \leq 30, -22 \leq k \leq 21, -20 \leq l \leq 20$                                         |
| $R[F^2 > 2\sigma(F^2)], wR(F^2), S$                                        | 0.053, 0.152, 1.05                                                                                   |
| No. of reflections, parameters, restraints                                 | 6095, 289, 36                                                                                        |
| Weighting scheme                                                           | $w = 1/[\sigma^2(F_o^2) + (0.0765P)^2]$ where $P = (F_o^2 + 2F_c^2)/3$                               |
| $\Delta\rho_{\max}, \Delta\rho_{\min}$ (e Å <sup>-3</sup> )                | 2.02, -1.35                                                                                          |

Computer programs: *APEX2* (Bruker-AXS, 2004), *CrysAlis PRO* 1.171.38.41 (Rigaku OD, 2015), *SAINT* (Bruker-AXS, 2004), *SHELXS2014* (Sheldrick, 2014), *SHELXL2014* (Sheldrick, 2014), *ShelXle* (Hübschle, 2011), *CIFTAB-2014* (Sheldrick, 2014).

**Table S2.** Selected geometric parameters (Å)

| <b>2</b>            |           |                      |           |
|---------------------|-----------|----------------------|-----------|
| O1—Ru1              | 2.096 (8) | O6—W3                | 2.127 (8) |
| O2—Ru1              | 2.088 (8) | O7—W2                | 1.885 (8) |
| O15—Ru1             | 2.101 (8) | O7—W3                | 1.954 (7) |
| O1—W1               | 2.020 (8) | O8—W2                | 1.762 (8) |
| O1—W4               | 2.124 (8) | O9—W2                | 1.734 (8) |
| O2—W1               | 2.016 (8) | O10—W3               | 1.726 (9) |
| O2—W2               | 2.133 (9) | O11—W3               | 1.753 (9) |
| O3—W1               | 1.728 (8) | O12—W3               | 1.933 (7) |
| O4—W1               | 1.855 (8) | O12—W4 <sup>i</sup>  | 1.868 (7) |
| O4—W3 <sup>i</sup>  | 2.166 (8) | O13—W4               | 1.744 (8) |
| O5—W1               | 2.275 (7) | O14—W4               | 1.744 (9) |
| O5—W2               | 2.235 (7) | O15—W2               | 2.031 (8) |
| O5—W4               | 2.243 (7) | O15—W4               | 2.050 (8) |
| O6—W1               | 1.841 (8) |                      |           |
| <b>3</b>            |           |                      |           |
| O1—Ru1              | 2.084 (4) | O6—W2                | 1.955 (4) |
| O2—Ru1              | 2.076 (4) | O6—W3                | 1.857 (4) |
| O13—Ru1             | 2.112 (4) | O7—W3                | 1.741 (4) |
| O1—W1               | 2.008 (4) | O8—W3                | 1.755 (5) |
| O1—W4               | 2.146 (4) | O9—W2                | 1.759 (4) |
| O2—W1               | 2.016 (4) | O10—W2               | 1.751 (5) |
| O2—W3               | 2.126 (4) | O11—W2 <sup>ii</sup> | 1.917 (4) |
| O3—W1               | 1.829 (4) | O11—W4               | 1.890 (4) |
| O3—W2 <sup>ii</sup> | 2.133 (4) | O12—W4               | 1.751 (4) |
| O4—W1               | 1.842 (4) | O13—W3               | 2.040 (4) |
| O4—W2               | 2.155 (4) | O13—W4               | 2.031 (4) |
| O5—W1               | 2.304 (4) | O14—W4               | 1.746 (5) |
| O5—W3               | 2.220 (4) | O21—W1               | 1.737 (4) |
| O5—W4               | 2.224 (4) |                      |           |
| <b>4</b>            |           |                      |           |
| O2—Ru1              | 2.110 (6) | O7—W2                | 1.724 (6) |
| O3—Ru1              | 2.079 (6) | O8—W4                | 1.738 (6) |
| O6—Ru1              | 2.069 (6) | O9—W4                | 1.756 (7) |
| O1—W2               | 2.311 (6) | O10—W1               | 1.956 (6) |
| O1—W3               | 2.220 (6) | O10—W4               | 1.857 (6) |
| O1—W4               | 2.224 (6) | O11—W1               | 2.154 (6) |
| O2—W3               | 2.047 (6) | O11—W2               | 1.838 (6) |

|                     |            |                       |            |
|---------------------|------------|-----------------------|------------|
| O2—W4               | 2.039 (6)  | O12—W1                | 1.756 (7)  |
| O3—W2               | 2.027 (6)  | O13—W1                | 1.926 (6)  |
| O3—W3               | 2.143 (6)  | O13—W3 <sup>i</sup>   | 1.882 (6)  |
| O4—W3               | 1.743 (6)  | O14—W1                | 1.730 (7)  |
| O5—W3               | 1.738 (6)  | O15—W1                | 2.117 (6)  |
| O6—W2               | 2.017 (6)  | O15—W2 <sup>i</sup>   | 1.839 (6)  |
| O6—W4               | 2.124 (6)  |                       |            |
| <b>5</b>            |            |                       |            |
| Ru1—O4              | 2.115 (4)  | O7—W2                 | 1.735 (4)  |
| Ru1—O5              | 2.094 (4)  | O8—W2                 | 1.832 (4)  |
| Ru1—O6              | 2.078 (4)  | O8—W3 <sup>iii</sup>  | 2.163 (4)  |
| O1—W1               | 1.734 (5)  | O9—W2                 | 1.821 (4)  |
| O2—W1               | 1.731 (5)  | O9—W3                 | 2.140 (4)  |
| O3—W1               | 2.227 (4)  | O10—W3                | 1.749 (5)  |
| O3—W2               | 2.305 (4)  | O11—W1                | 1.891 (4)  |
| O3—W4               | 2.227 (4)  | O11—W3                | 1.915 (4)  |
| O4—W1               | 2.036 (4)  | O12—W3                | 1.760 (5)  |
| O4—W4               | 2.036 (4)  | O13—W3 <sup>iii</sup> | 1.953 (4)  |
| O5—W1               | 2.158 (5)  | O13—W4                | 1.863 (4)  |
| O5—W2               | 2.016 (4)  | O14—W4                | 1.743 (5)  |
| O6—W2               | 2.007 (4)  | O15—W4                | 1.742 (5)  |
| O6—W4               | 2.131 (4)  |                       |            |
| <b>6</b>            |            |                       |            |
| O1—Ru1              | 2.091 (10) | O8—W2                 | 1.877 (12) |
| O2—Ru1              | 2.088 (10) | O8—W3                 | 1.927 (12) |
| O13—Ru1             | 2.112 (11) | O9—W3                 | 1.738 (13) |
| O1—W1               | 2.079 (10) | O10—W3                | 1.745 (12) |
| O1—W4               | 2.193 (11) | O11—W3 <sup>ii</sup>  | 1.907 (11) |
| O2—W1               | 1.982 (11) | O11—W4                | 1.890 (11) |
| O2—W2               | 2.162 (10) | O12—W4                | 1.731 (12) |
| O3—W1               | 1.724 (10) | O13—W2                | 2.061 (11) |
| O4—W1               | 1.826 (10) | O13—W4                | 2.023 (11) |
| O4—W3 <sup>ii</sup> | 2.170 (10) | O14—W4 <sup>ii</sup>  | 1.766 (11) |
| O5—W1               | 1.827 (10) | O15—W1                | 2.301 (10) |
| O5—W3               | 2.147 (10) | O15—W2                | 2.239 (10) |
| O6—W2               | 1.765 (11) | O15—W4                | 2.215 (11) |
| O7—W2               | 1.751 (14) |                       |            |

Symmetry code(s): (i)  $-x+1, -y+1, -z+1$ ; (ii)  $-x+3/2, -y+1/2, -z+1$ ; (iii)  $-x+1/2, -y+3/2, -z+1$ .

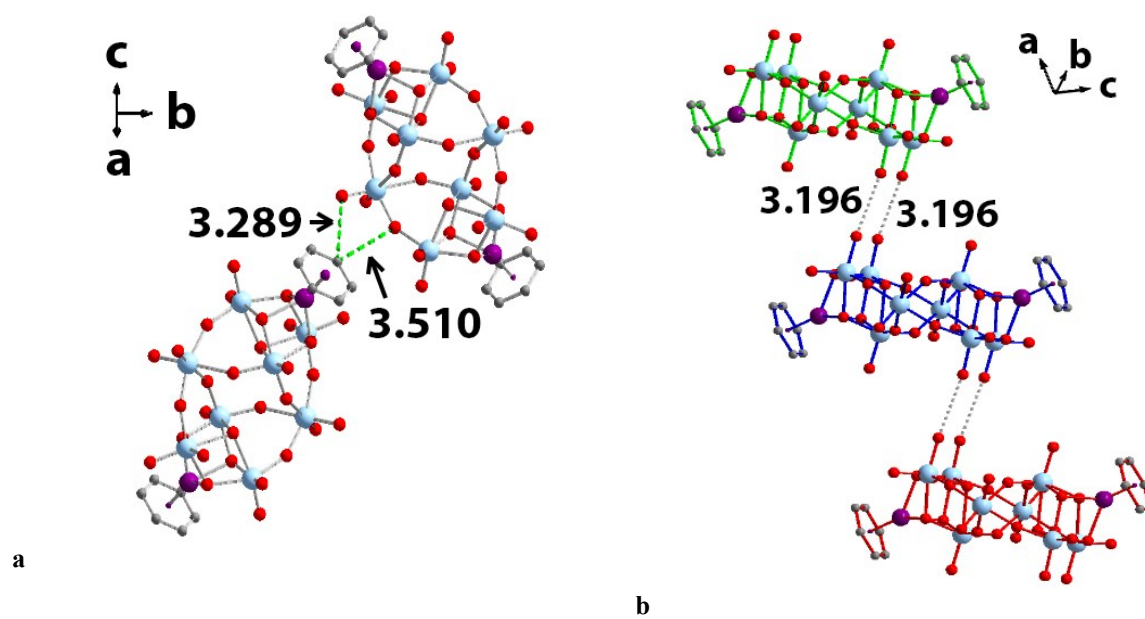

**Figure S1.** Location of polyanions (a) in the plane of the layer and (b) in adjacent layers in structures of type A. The gray dotted line marks the shortest distances O... O. Green dotted line - contacts edge C<sub>6</sub>H<sub>6</sub>...O, red - plane C<sub>6</sub>H<sub>6</sub>...O.

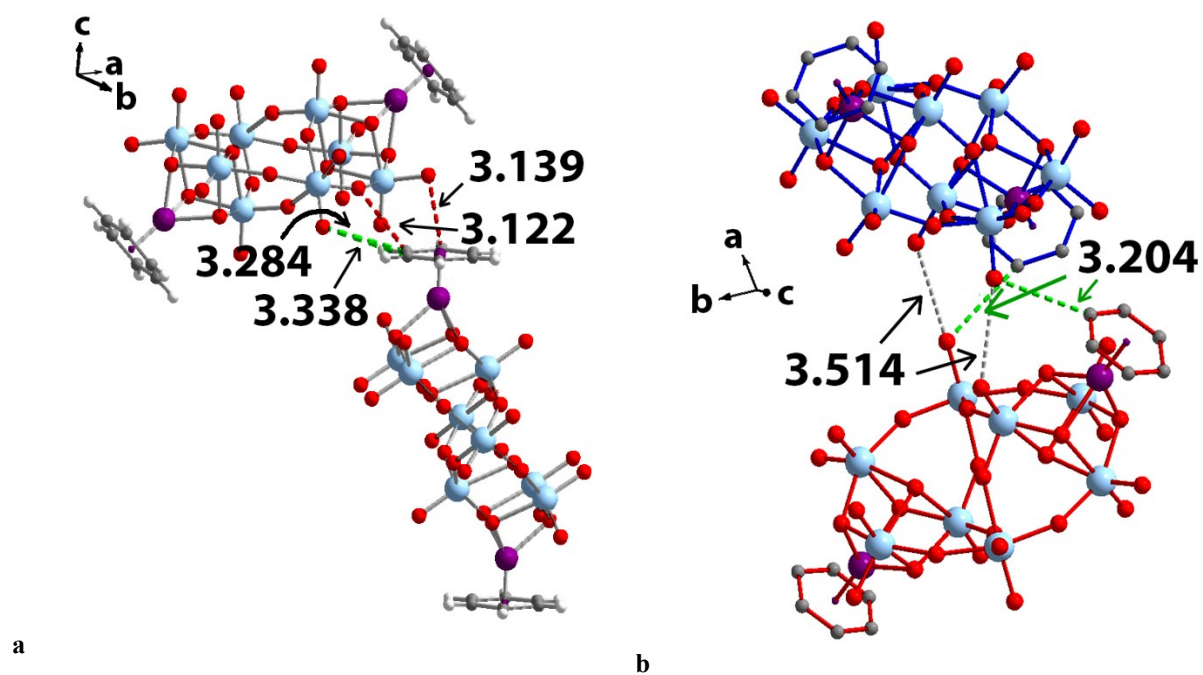

**Figure S2.** Location of polyanions (a) in the plane of the layer and (b) the nearest in adjacent layers in structures of type B. Gray dotted line marks the shortest distances O... O. Green dotted line - contacts edge C<sub>6</sub>H<sub>6</sub>...O, red - plane C<sub>6</sub>H<sub>6</sub>...O.



1

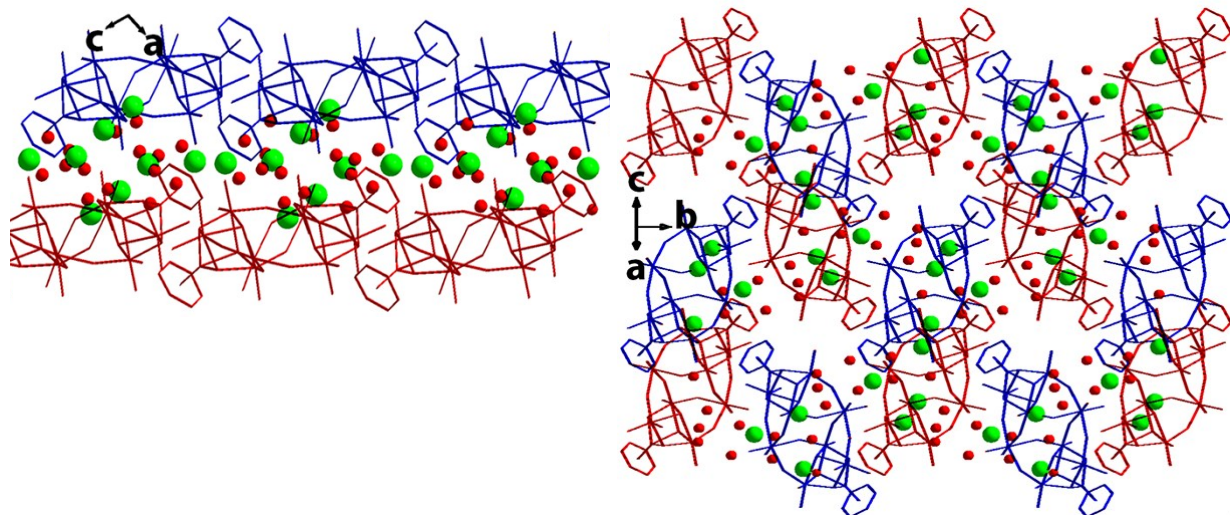

2

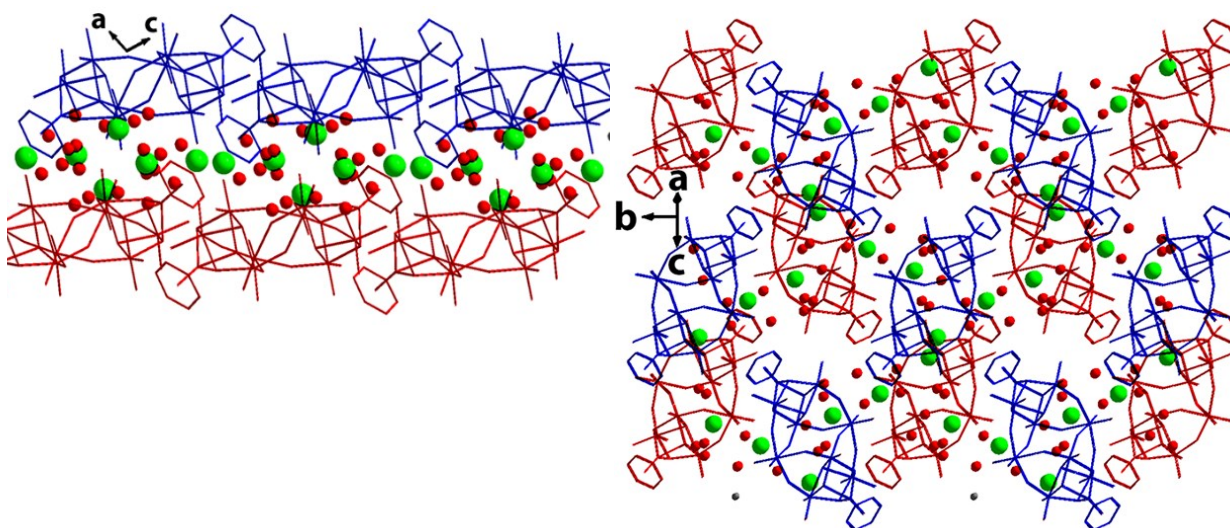

Figure S3. Relative location of anionic and water-cationic layers in structures of type A.

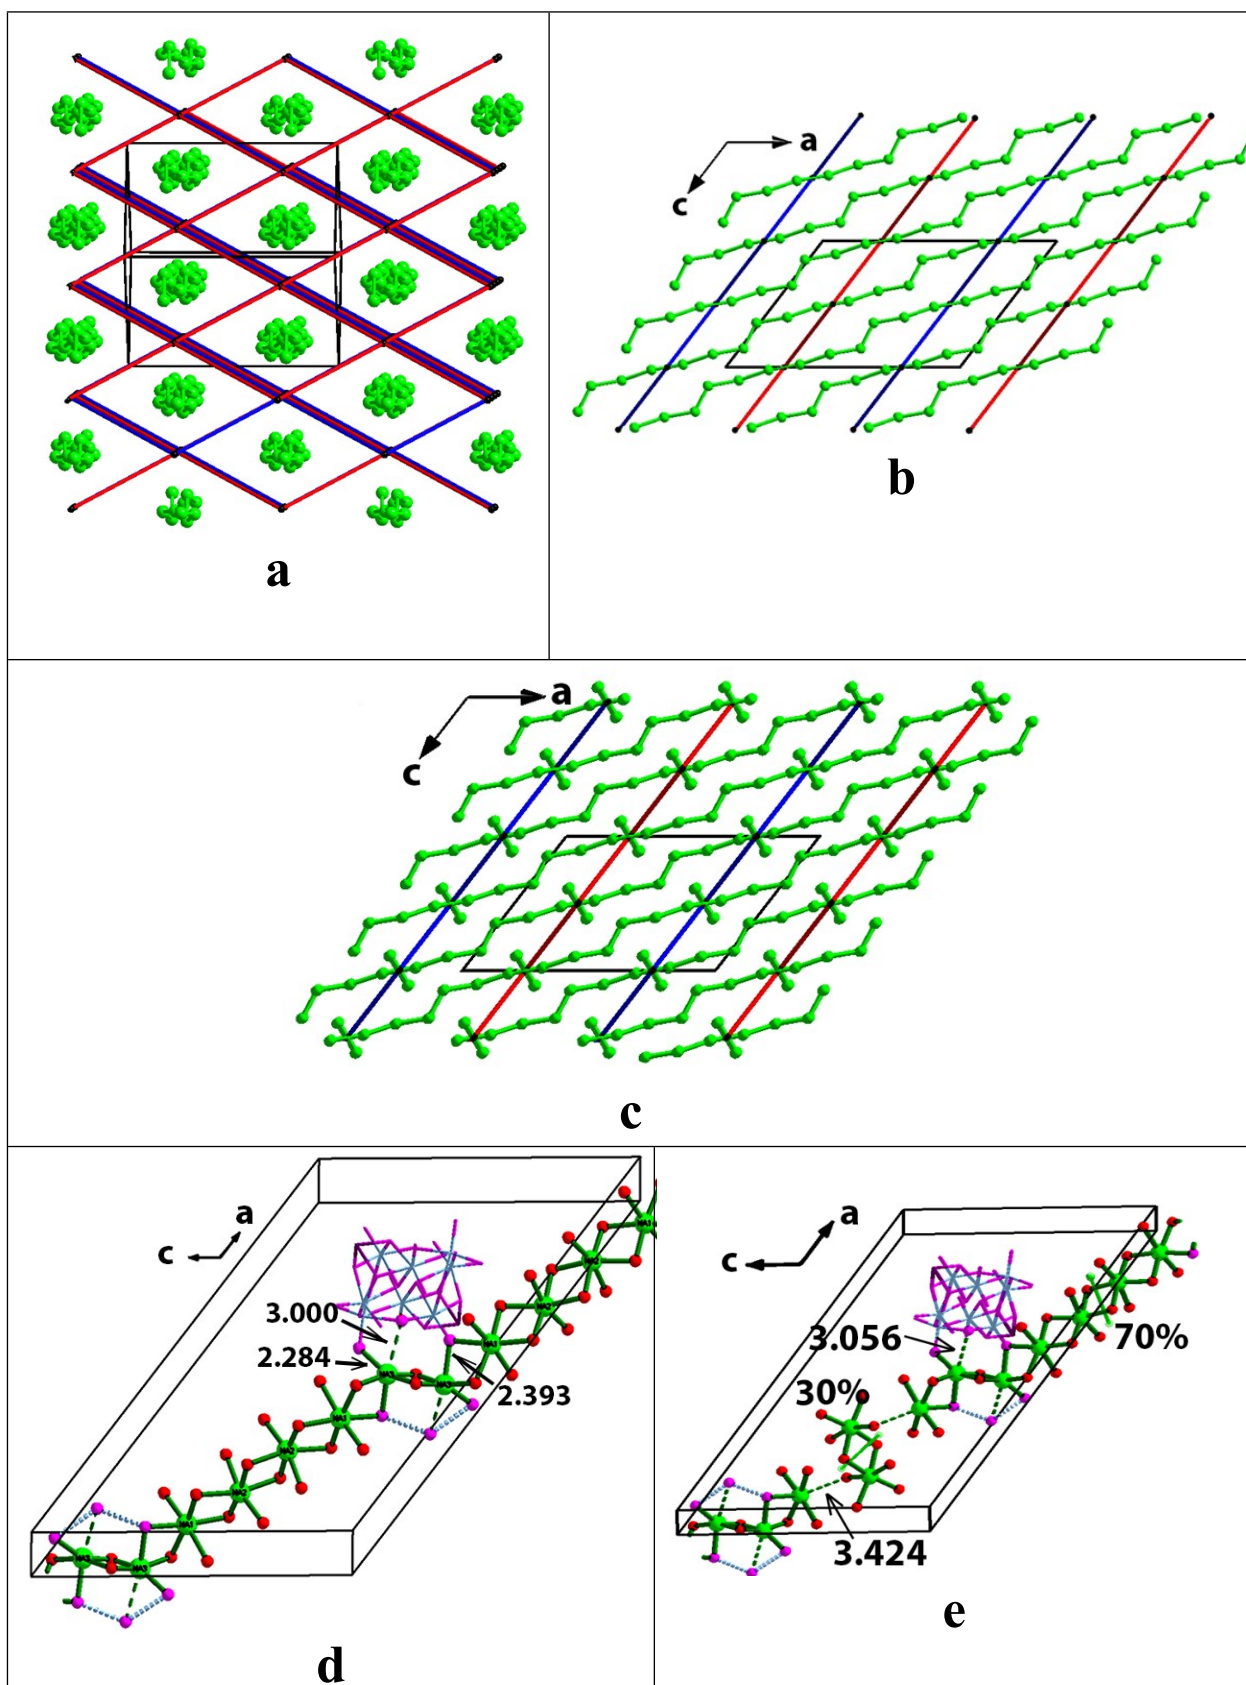

**Figure S4.** Arrangement of Na<sup>+</sup> coordination chains relative to polyanionic layers in structures **5** and **3**. (a) general view along the direction of the chains, (b, c) - view perpendicular to the direction of layers and chains for **5** and **3**, respectively, (d, e) - coordination structure of single cationic chains for **5** and **3**, respectively. Green balls show Na atoms, red - coordinated water molecules, pink - oxygen atoms of polyanions. The belonging of oxygen atoms to one polyanion is shown by blue dashed lines.

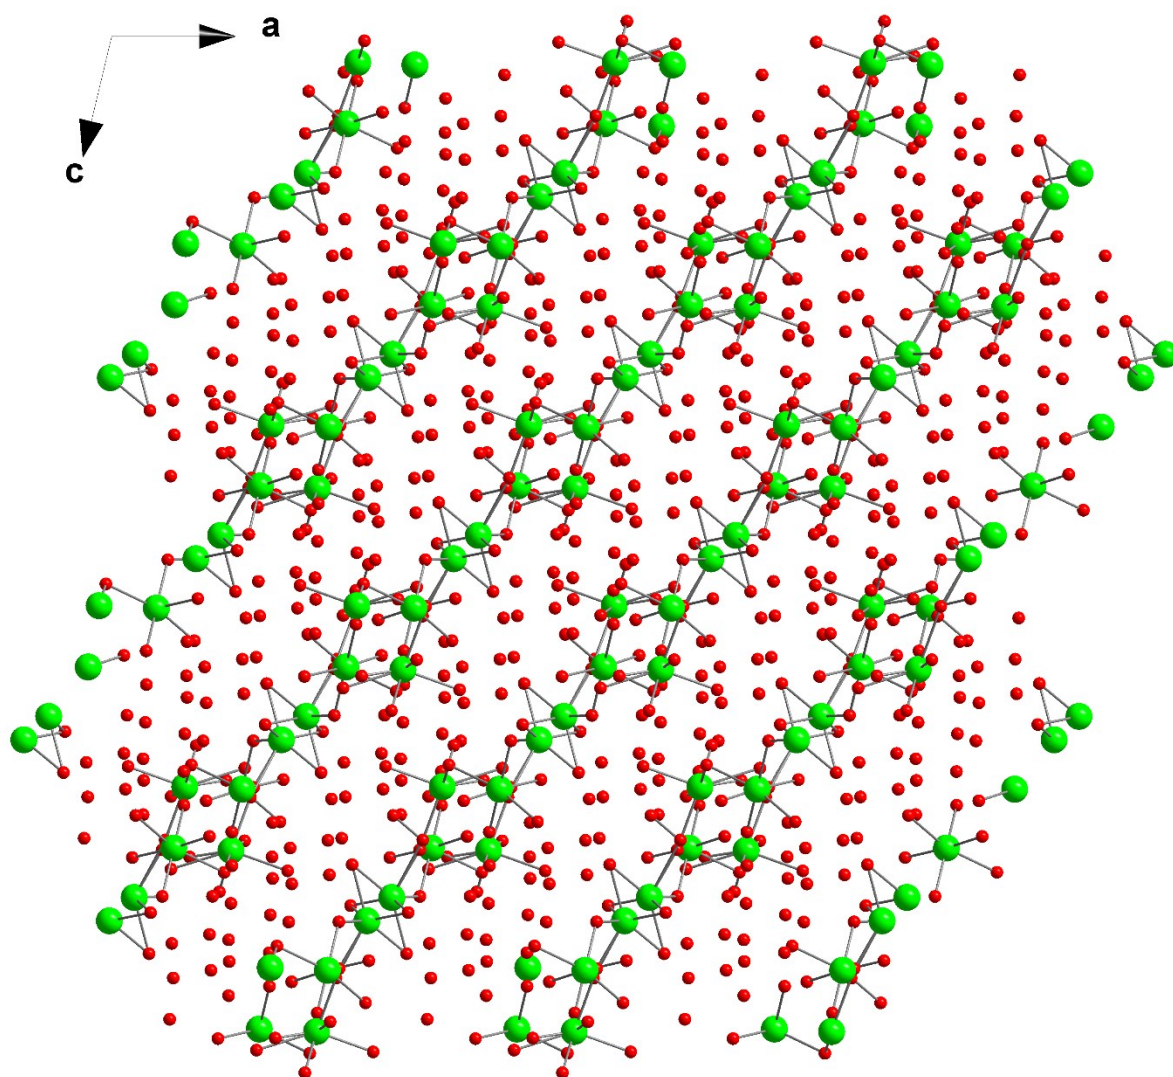

Fig. S1. Layers of hydrated Na<sup>+</sup> cations in the crystal structure of 2.

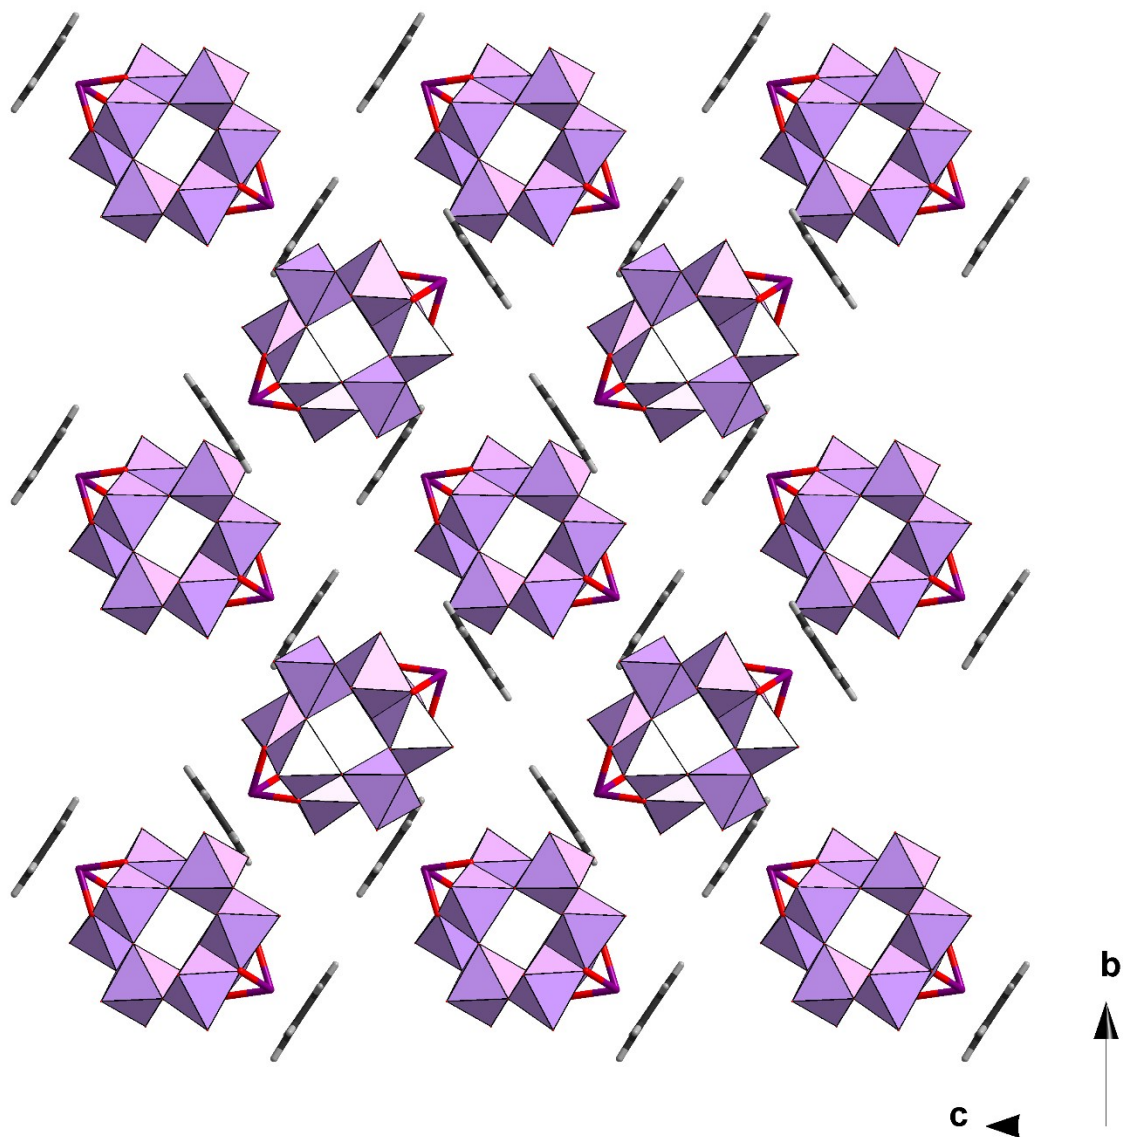

Fig. S2. Pseudo layered packing of POM hybrid anions in the crystal structure of **2**.

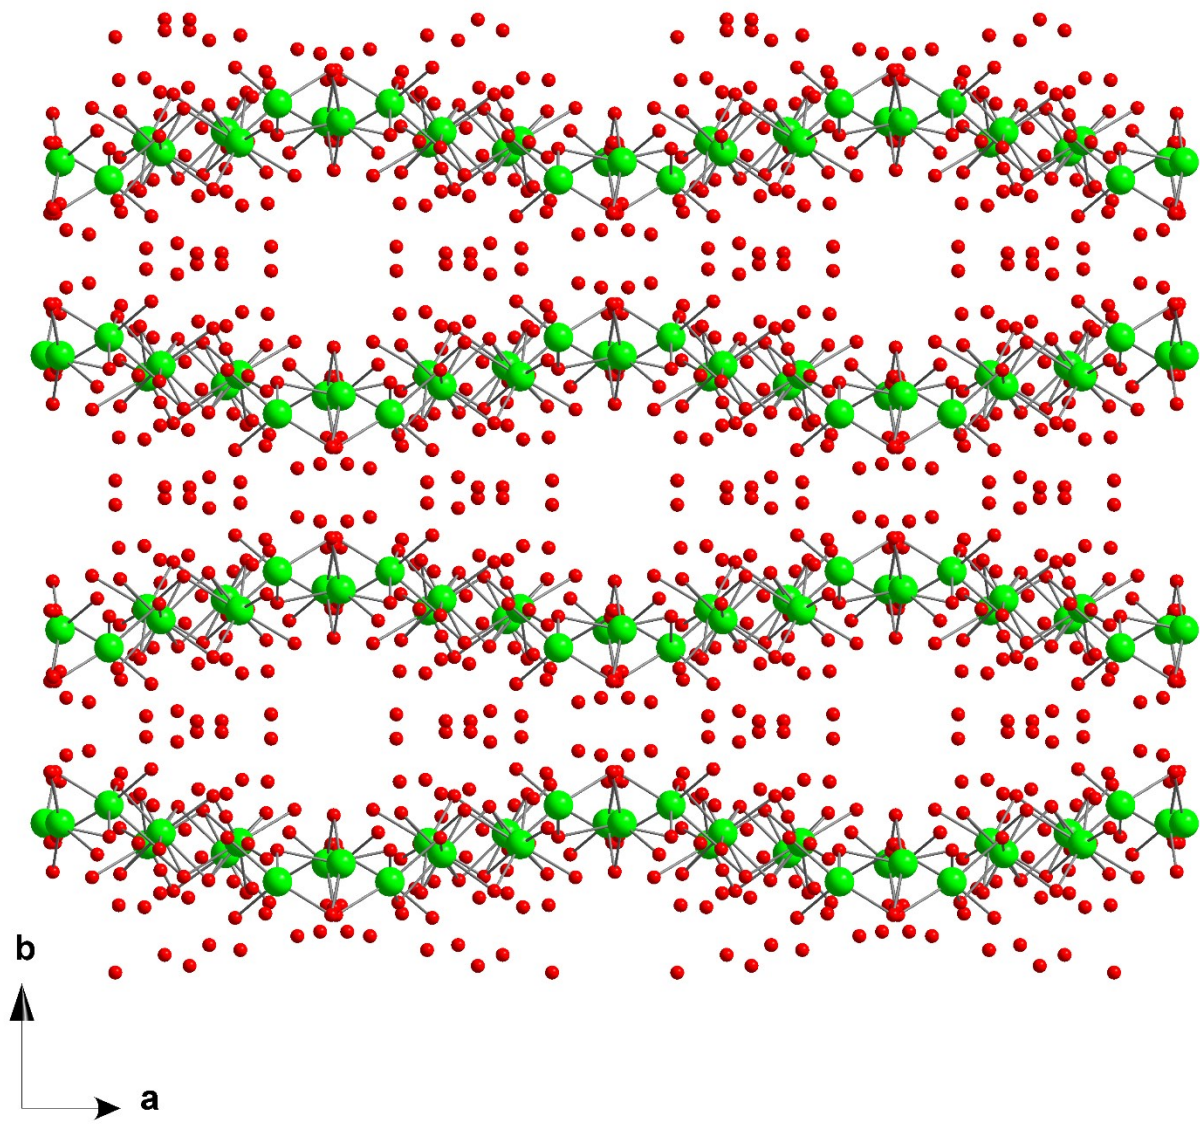

Fig. S3. Crimped pseudo layers of hydrated sodium cations in the crystal structure of **3**.

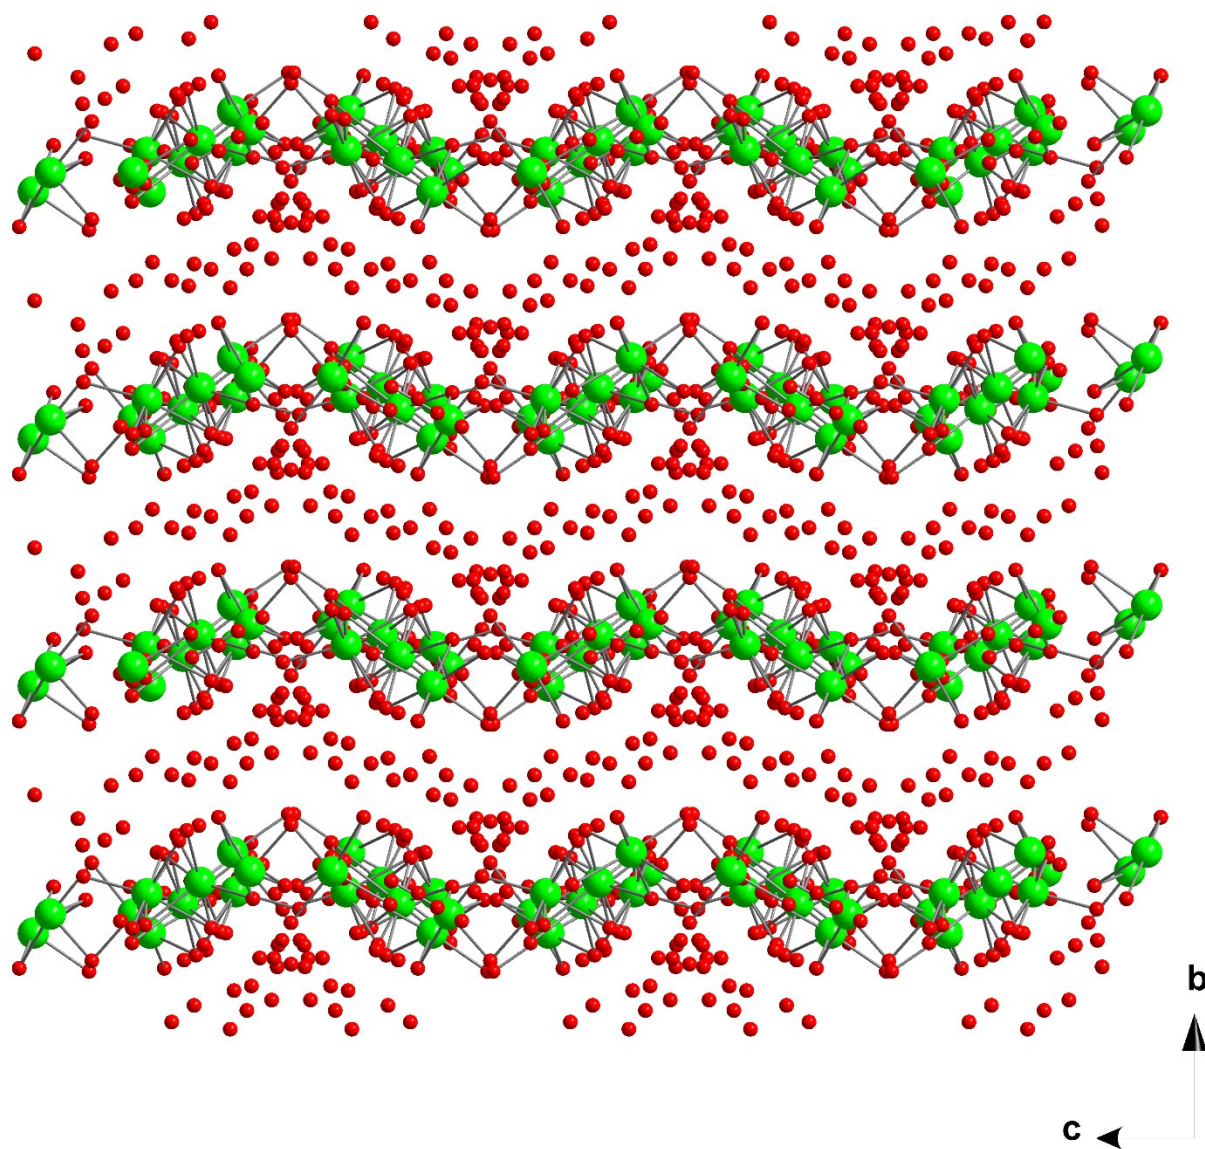

Fig. S4. Crimped pseudo layers of hydrated sodium cations in the crystal structure of **3**.

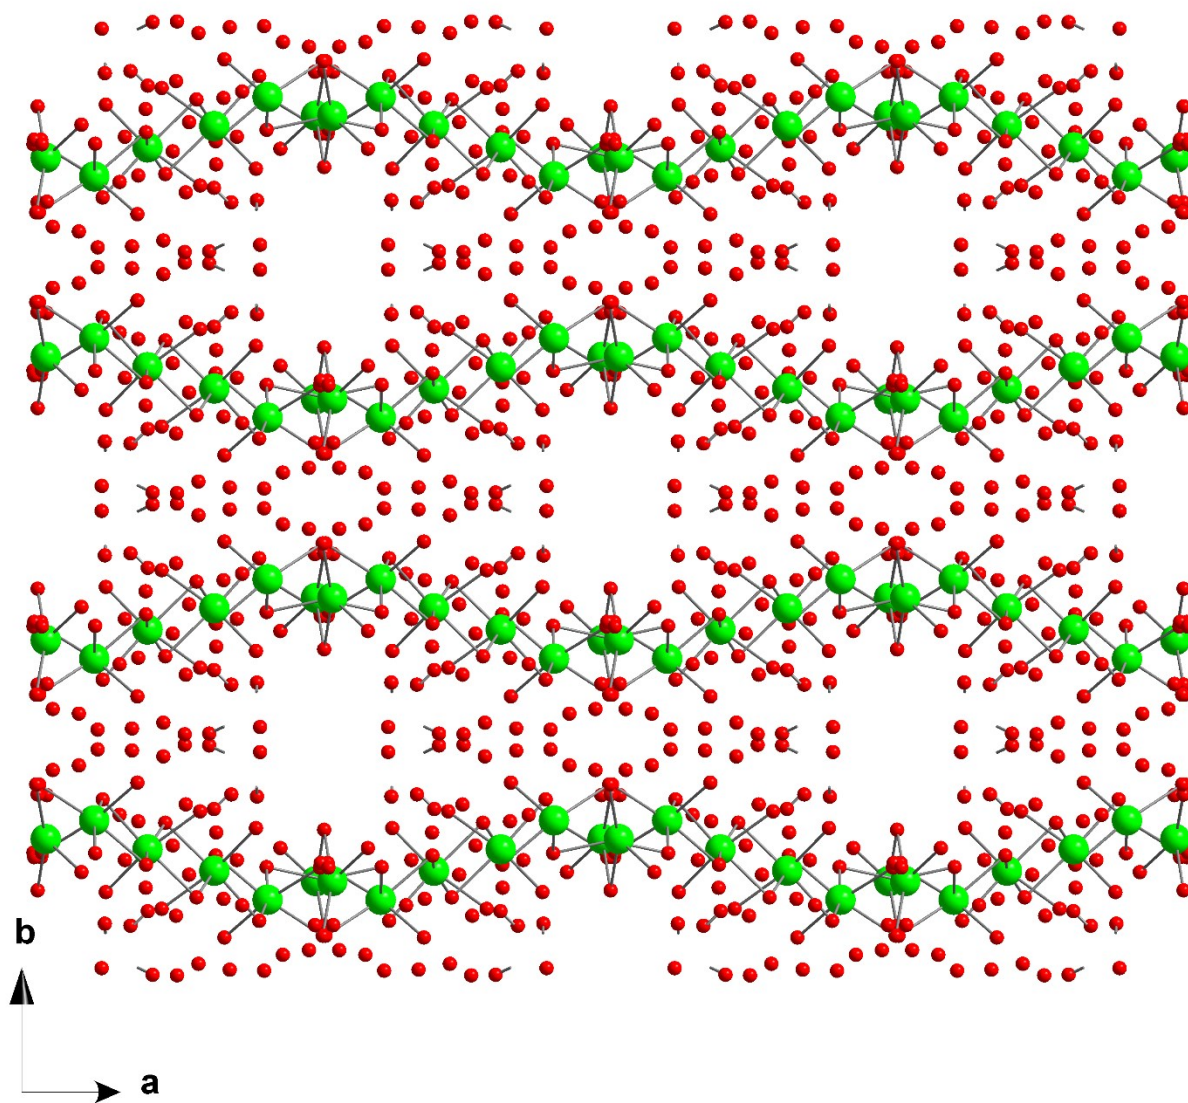

Fig. S5. Crimped pseudo layers of hydrated sodium cations in the crystal structure of **5**.

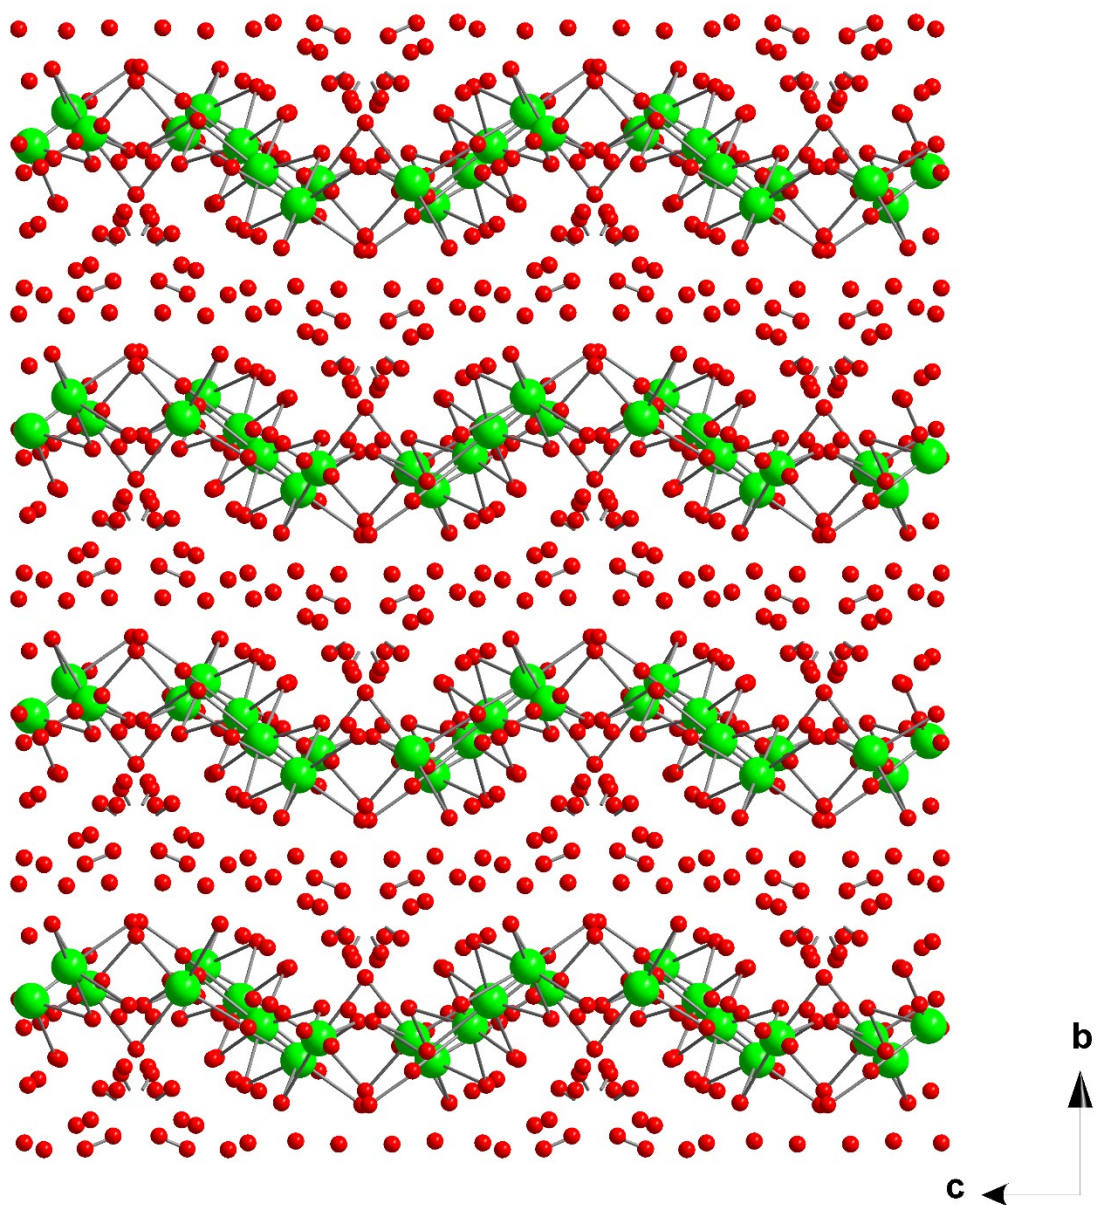

Fig. S6. Crimped pseudo layers of hydrated sodium cations in the crystal structure of 5.



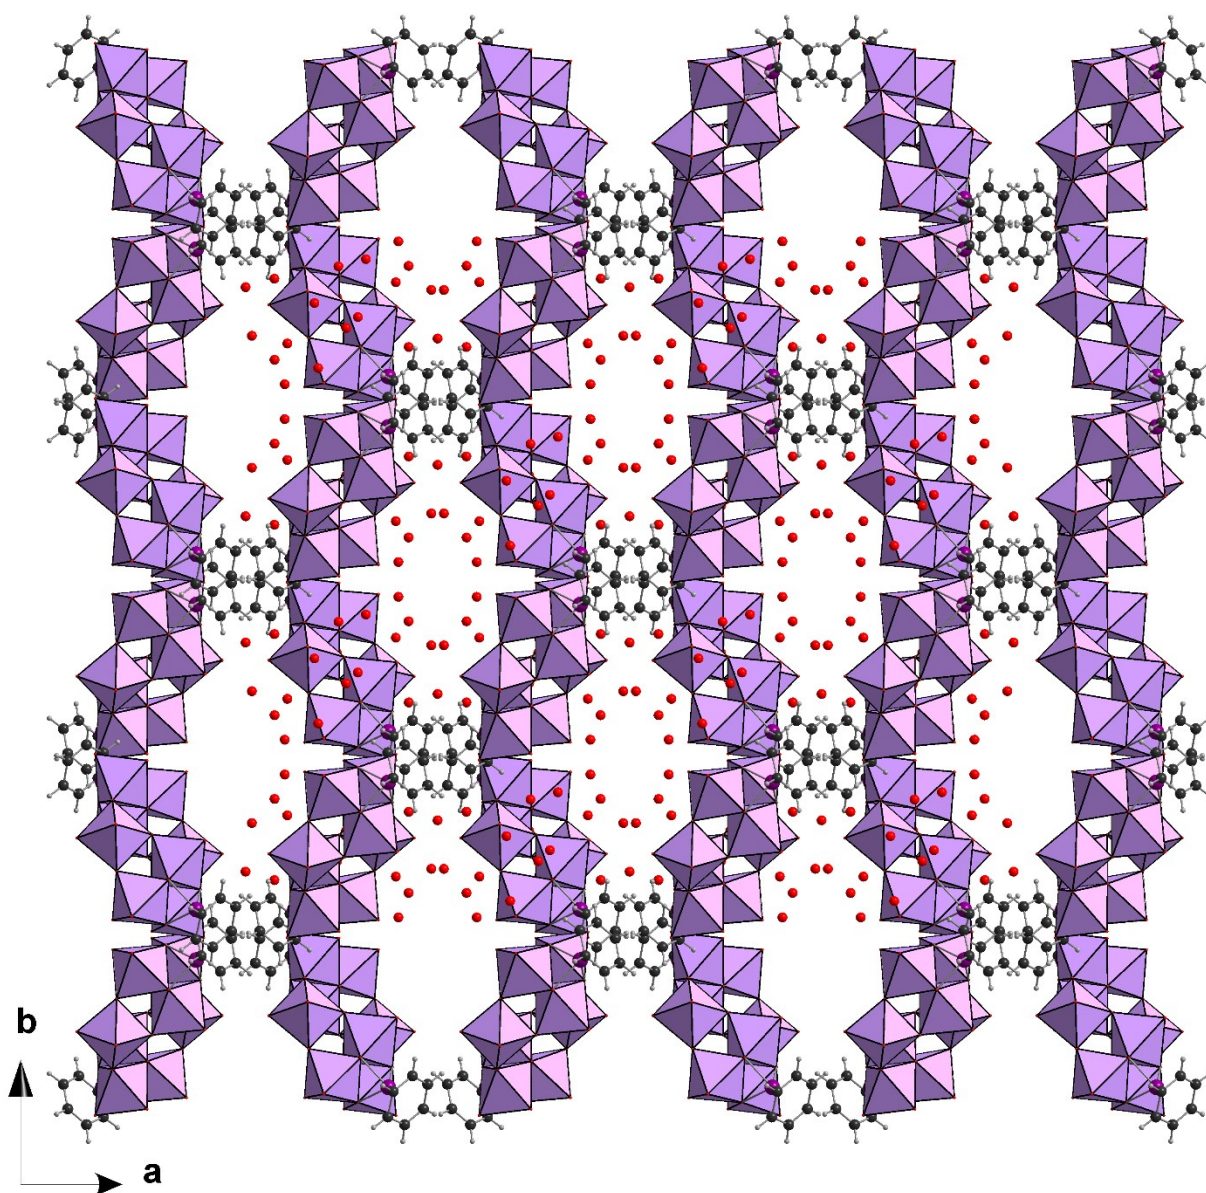

Fig. S7. Crystal packing of 6.

BVS part

### Complex 2

O4 -1,20 partially protonated

O5 -1,20 partially protonated

O12 -0,89 - protonated

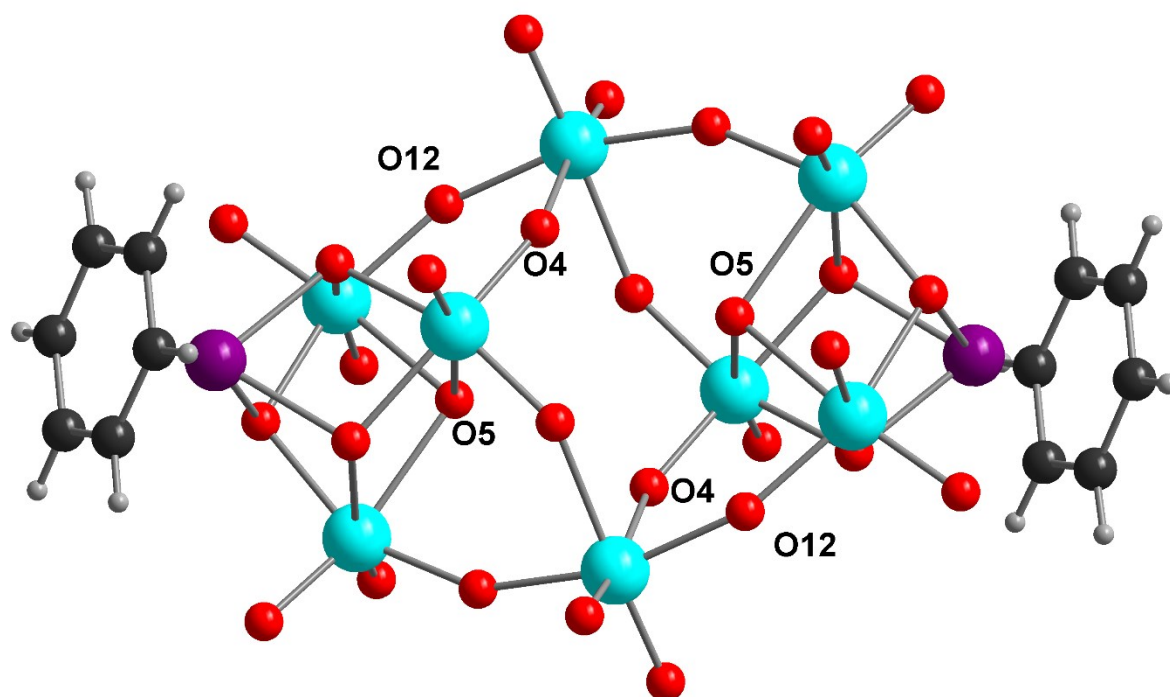

### Complex 3

O3 -1,28 partially protonated

O5 -1,24 partially protonated

O11 -1,08 protonated

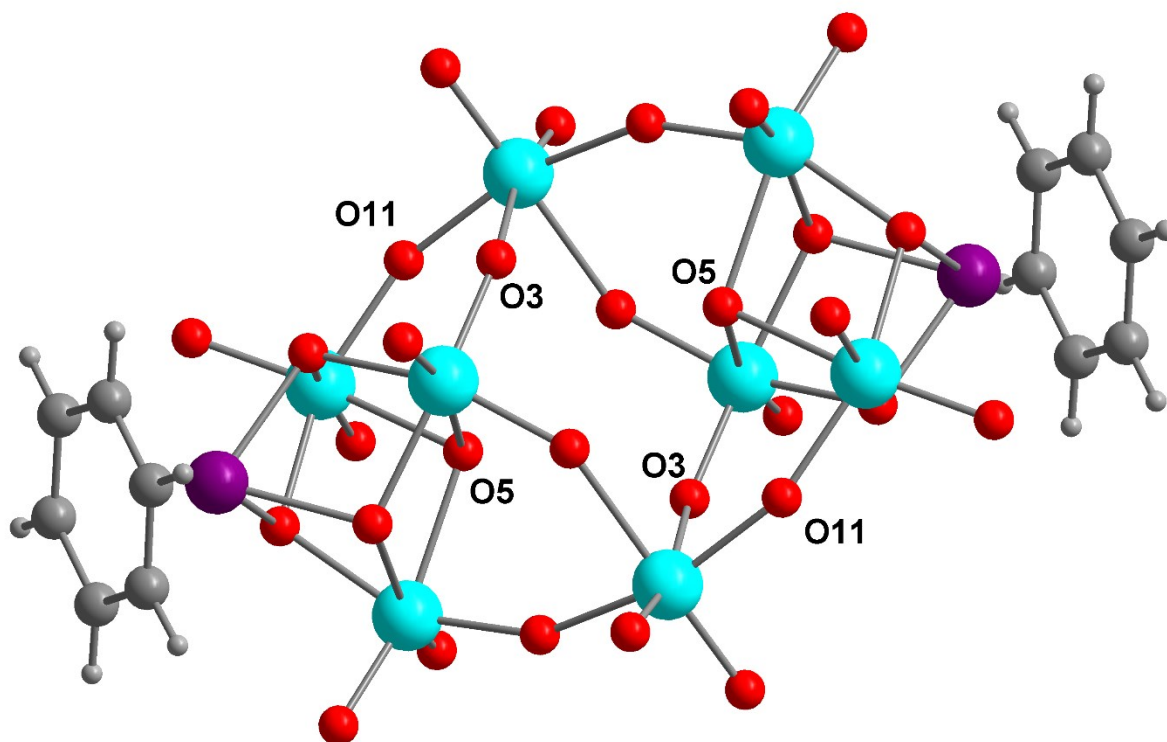

### Complex 4

O13 -0,99 protonated

O15 -0,60 protonated

O1 -1,17 partially protonated

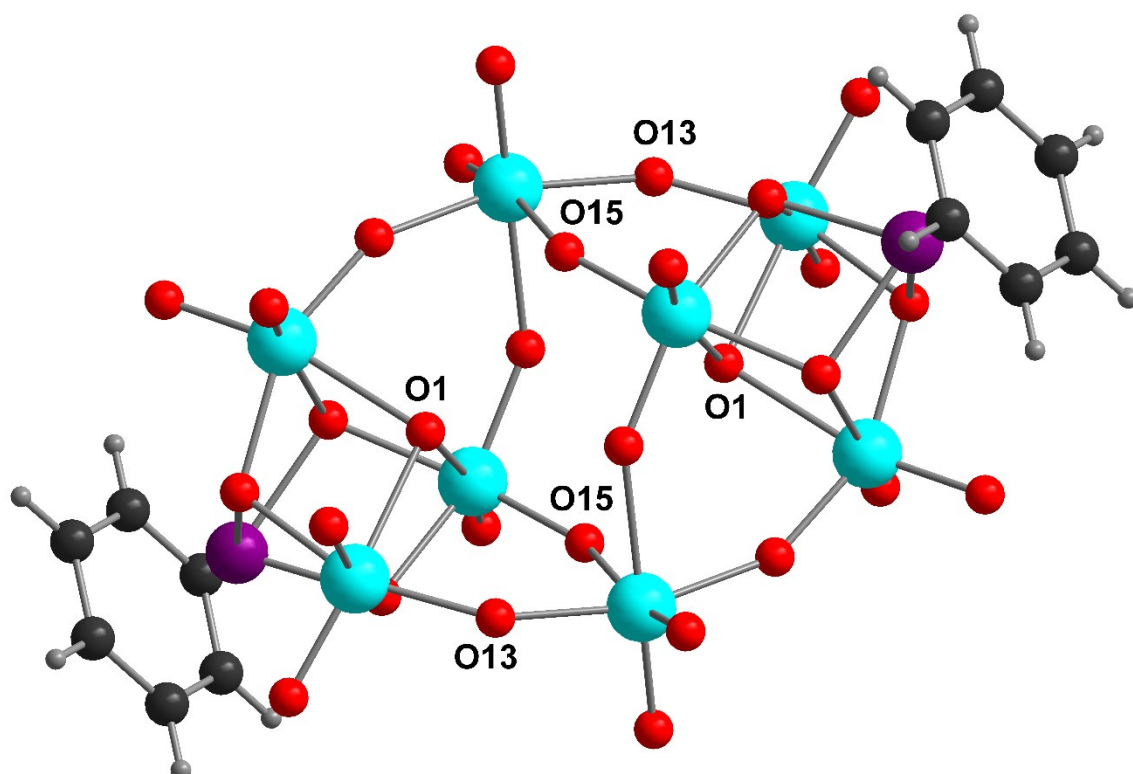

### Complex 5

O3 -1,23 partially protonated

O8 -1,27 partially protonated

O13 -1,17 partially protonated

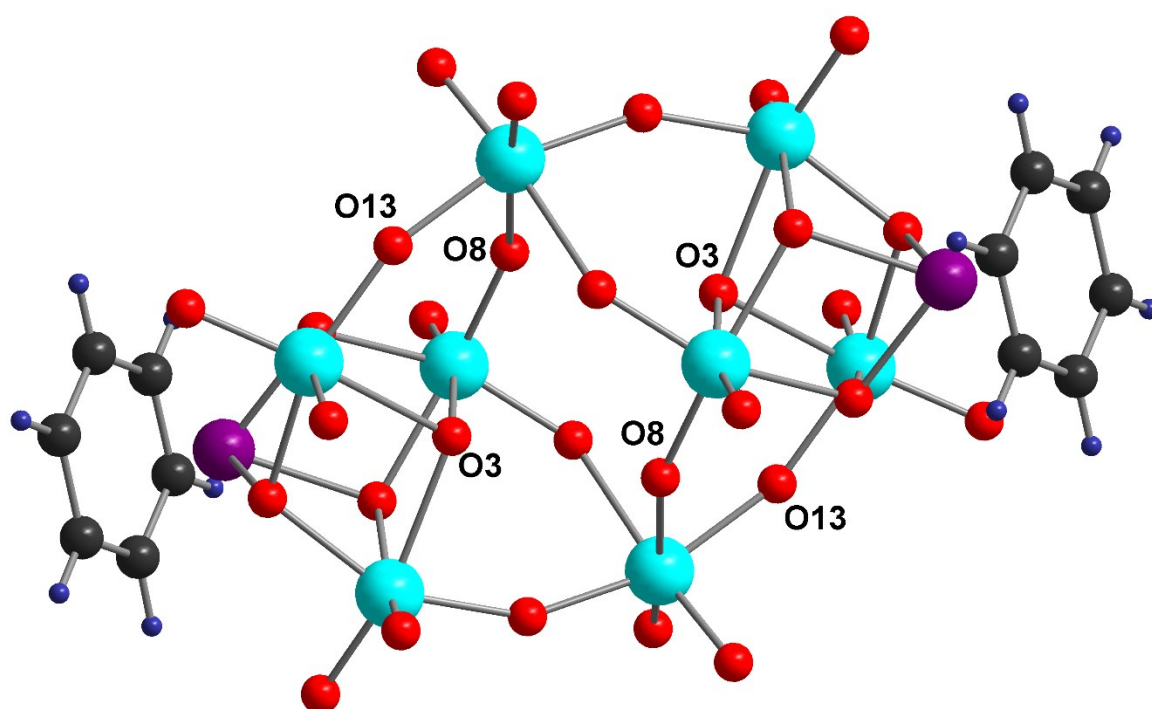

### Complex 6

O4 -1,28 partially protonated

O11 -1,00 protonated

O14 0,00 – H<sub>2</sub>O! wrong value  $d(W4-O14) = 1.76!$

O15 -1,19 partially protonated

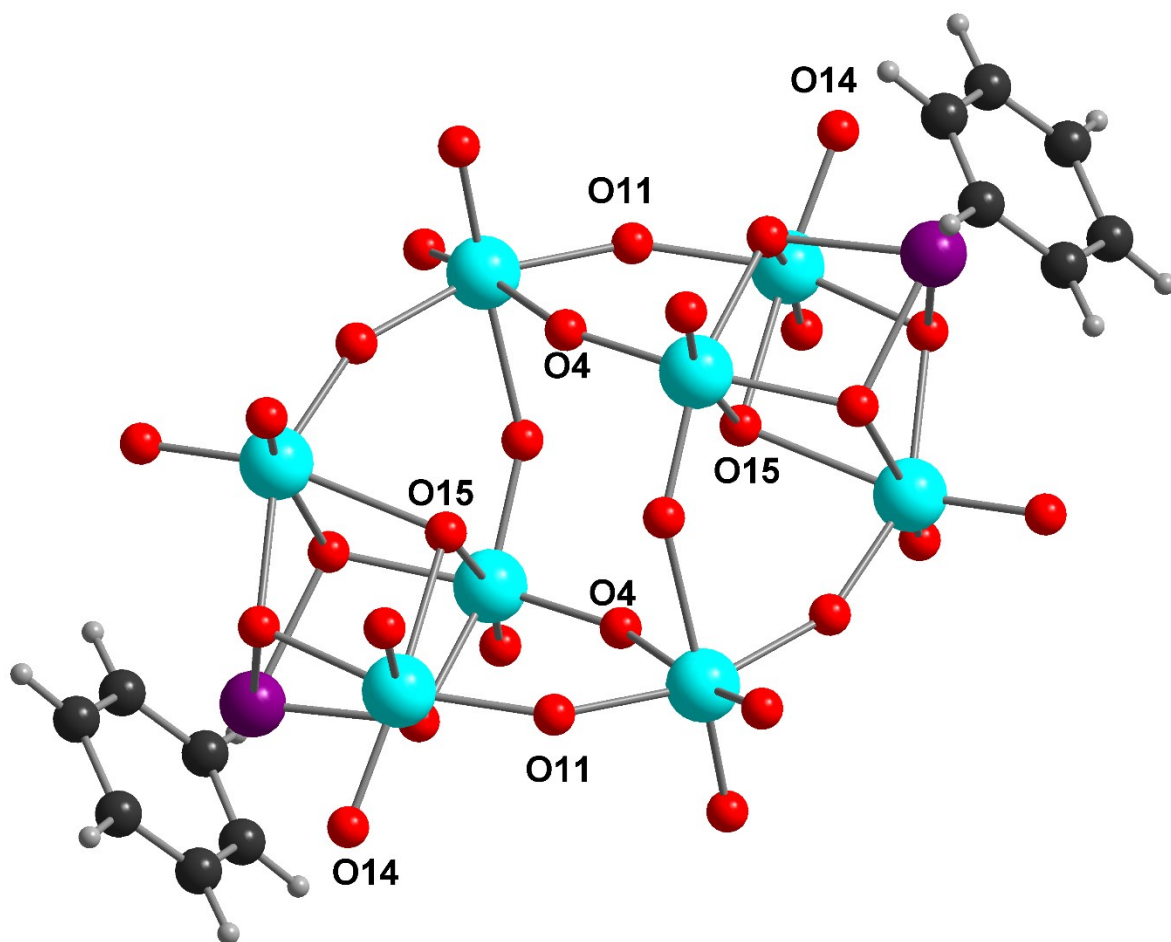

**Table S3.** Cartesian atomic coordinates for model structures

| Atom       | X         | Y         | Z        |
|------------|-----------|-----------|----------|
| <b>pH5</b> |           |           |          |
| C          | 13.067997 | 7.249894  | 0.863750 |
| H          | 13.177963 | 6.387849  | 0.480799 |
| C          | 11.862562 | 7.677111  | 1.202503 |
| H          | 11.105318 | 7.132757  | 1.025947 |
| C          | 11.690152 | 8.940502  | 1.827372 |
| H          | 10.816035 | 9.209009  | 2.082678 |
| C          | 12.699595 | 9.756594  | 2.064903 |
| H          | 12.544616 | 10.607539 | 2.456479 |
| C          | 13.998002 | 9.356764  | 1.738298 |
| H          | 14.753656 | 9.899328  | 1.936461 |
| C          | 14.136198 | 8.045904  | 1.066192 |
| H          | 14.993792 | 7.759213  | 0.772193 |
| O          | 11.894766 | 6.802595  | 4.297158 |
| O          | 14.291068 | 6.311479  | 3.742469 |
| O          | 12.452390 | 4.259381  | 3.105453 |
| O          | 11.697587 | 4.553321  | 5.754737 |
| O          | 14.345448 | 3.981874  | 5.135266 |
| O          | 16.416287 | 8.186484  | 4.009691 |
| O          | 15.716310 | 8.367229  | 6.680570 |
| O          | 16.200255 | 5.853226  | 5.664313 |
| O          | 17.017141 | 3.452418  | 4.598121 |
| O          | 17.655678 | 4.153490  | 7.131339 |
| O          | 10.952409 | 6.899358  | 6.835775 |
| O          | 12.703255 | 8.951456  | 7.436351 |
| O          | 13.691018 | 8.610048  | 4.823506 |
| O          | 13.592055 | 6.503179  | 6.217653 |
| Ru         | 13.107267 | 7.834852  | 2.944039 |
| W          | 12.979620 | 5.044437  | 4.546701 |

|   |           |           |           |
|---|-----------|-----------|-----------|
| W | 15.352300 | 7.468797  | 5.226095  |
| W | 16.271340 | 3.972928  | 6.083367  |
| W | 12.115948 | 8.145223  | 6.015347  |
| O | 10.968028 | 9.278258  | 5.293171  |
| C | 13.639272 | 1.878656  | 12.632350 |
| H | 13.529307 | 2.740701  | 13.015302 |
| C | 14.844707 | 1.451439  | 12.293598 |
| H | 15.601951 | 1.995793  | 12.470154 |
| C | 15.017117 | 0.188048  | 11.668728 |
| H | 15.891234 | -0.080459 | 11.413423 |
| C | 14.007675 | -0.628044 | 11.431197 |
| H | 14.162653 | -1.478989 | 11.039621 |
| C | 12.709267 | -0.228214 | 11.757803 |
| H | 11.953614 | -0.770778 | 11.559639 |
| C | 12.571072 | 1.082646  | 12.429908 |
| H | 11.713477 | 1.369337  | 12.723907 |
| O | 14.812503 | 2.325955  | 9.198942  |
| O | 12.416201 | 2.817071  | 9.753632  |
| O | 14.254879 | 4.869169  | 10.390648 |
| O | 15.009682 | 4.575229  | 7.741363  |
| O | 12.361821 | 5.146676  | 8.360834  |
| O | 10.290982 | 0.942066  | 9.486409  |
| O | 10.990959 | 0.761321  | 6.815531  |
| O | 10.507014 | 3.275324  | 7.831787  |
| O | 9.690128  | 5.676132  | 8.897979  |
| O | 9.051591  | 4.975060  | 6.364761  |
| O | 15.754861 | 2.229192  | 6.660325  |
| O | 14.004014 | 0.177094  | 6.059749  |
| O | 13.016251 | 0.518502  | 8.672594  |
| O | 13.115214 | 2.625371  | 7.278447  |



|    |           |           |            |
|----|-----------|-----------|------------|
| Ru | 13.600002 | 1.293698  | 10.552061  |
| W  | 13.727649 | 4.084113  | 8.949399   |
| W  | 11.354969 | 1.659753  | 8.270005   |
| W  | 10.435929 | 5.155622  | 7.412733   |
| W  | 14.591322 | 0.983327  | 7.480753   |
| O  | 15.739241 | -0.149708 | 8.202930   |
| C  | 10.548828 | 16.378444 | -12.632350 |
| H  | 10.658793 | 15.516399 | -13.015302 |
| C  | 9.343393  | 16.805661 | -12.293598 |
| H  | 8.586149  | 16.261307 | -12.470154 |
| C  | 9.170983  | 18.069052 | -11.668728 |
| H  | 8.296866  | 18.337559 | -11.413423 |
| C  | 10.180425 | 18.885144 | -11.431197 |
| H  | 10.025447 | 19.736089 | -11.039621 |
| C  | 11.478833 | 18.485314 | -11.757803 |
| H  | 12.234486 | 19.027878 | -11.559639 |
| C  | 11.617028 | 17.174454 | -12.429908 |
| H  | 12.474623 | 16.887763 | -12.723907 |
| O  | 9.375597  | 15.931145 | -9.198942  |
| O  | 11.771899 | 15.440029 | -9.753632  |
| O  | 9.933221  | 13.387931 | -10.390648 |
| O  | 9.178418  | 13.681871 | -7.741363  |
| O  | 11.826279 | 13.110424 | -8.360834  |
| O  | 13.897118 | 17.315034 | -9.486409  |
| O  | 13.197141 | 17.495779 | -6.815531  |
| O  | 13.681086 | 14.981776 | -7.831787  |
| O  | 14.497972 | 12.580968 | -8.897979  |
| O  | 15.136509 | 13.282040 | -6.364761  |
| O  | 8.433239  | 16.027908 | -6.660325  |
| O  | 10.184086 | 18.080006 | -6.059749  |

|    |           |           |            |
|----|-----------|-----------|------------|
| O  | 11.171849 | 17.738598 | -8.672594  |
| O  | 11.072886 | 15.631729 | -7.278447  |
| Ru | 10.588098 | 16.963402 | -10.552061 |
| W  | 10.460451 | 14.172987 | -8.949399  |
| W  | 12.833131 | 16.597347 | -8.270005  |
| W  | 13.752171 | 13.101478 | -7.412733  |
| W  | 9.596778  | 17.273773 | -7.480753  |
| O  | 8.448859  | 18.406808 | -8.202930  |
| C  | 11.120103 | 11.007206 | -0.863750  |
| H  | 11.010137 | 11.869251 | -0.480799  |
| C  | 12.325538 | 10.579989 | -1.202503  |
| H  | 13.082782 | 11.124343 | -1.025947  |
| C  | 12.497948 | 9.316598  | -1.827372  |
| H  | 13.372065 | 9.048091  | -2.082678  |
| C  | 11.488505 | 8.500506  | -2.064903  |
| H  | 11.643484 | 7.649561  | -2.456479  |
| C  | 10.190098 | 8.900336  | -1.738298  |
| H  | 9.434444  | 8.357772  | -1.936461  |
| C  | 10.051902 | 10.211196 | -1.066192  |
| H  | 9.194308  | 10.497887 | -0.772193  |
| O  | 12.293334 | 11.454505 | -4.297158  |
| O  | 9.897032  | 11.945621 | -3.742469  |
| O  | 11.735710 | 13.997719 | -3.105453  |
| O  | 12.490513 | 13.703779 | -5.754737  |
| O  | 9.842652  | 14.275226 | -5.135266  |
| O  | 7.771813  | 10.070616 | -4.009691  |
| O  | 8.471790  | 9.889871  | -6.680570  |
| O  | 7.987845  | 12.403874 | -5.664313  |
| O  | 7.170959  | 14.804682 | -4.598121  |
| O  | 6.532422  | 14.103610 | -7.131339  |

|            |             |             |             |
|------------|-------------|-------------|-------------|
| O          | 13.235691   | 11.357742   | -6.835775   |
| O          | 11.484845   | 9.305644    | -7.436351   |
| O          | 10.497082   | 9.647052    | -4.823506   |
| O          | 10.596045   | 11.753921   | -6.217653   |
| Ru         | 11.080833   | 10.422248   | -2.944039   |
| W          | 11.208480   | 13.212663   | -4.546701   |
| W          | 8.835800    | 10.788303   | -5.226095   |
| W          | 7.916760    | 14.284172   | -6.083367   |
| W          | 12.072152   | 10.111877   | -6.015347   |
| O          | 13.220072   | 8.978842    | -5.293171   |
| <b>pH6</b> |             |             |             |
| Ru         | 8.18710400  | 9.50792900  | 9.93921500  |
| O          | 6.10115100  | 8.07833200  | 12.36437700 |
| O          | 7.90901200  | 8.33051400  | 14.38260300 |
| O          | 8.76396500  | 10.81314000 | 13.21170300 |
| O          | 8.80253700  | 8.72923300  | 11.80634900 |
| O          | 7.02472200  | 10.53369500 | 11.34978000 |
| O          | 9.41403800  | 10.97501300 | 10.73553700 |
| O          | 7.58752800  | 13.02484100 | 10.06370900 |
| O          | 9.47140100  | 13.29747000 | 12.10935700 |
| O          | 6.83615900  | 12.77947500 | 12.76061900 |
| O          | 4.21196200  | 12.35349300 | 13.63947900 |
| O          | 6.16708800  | 10.46042600 | 13.94248800 |
| O          | 5.16823900  | 11.80482700 | 16.11838800 |
| O          | 11.38368800 | 11.40951500 | 12.56729700 |
| O          | 11.49939700 | 9.11432200  | 10.96587800 |
| O          | 10.84413900 | 8.90814600  | 13.62439800 |
| C          | 9.10829200  | 8.05447700  | 8.63641700  |
| H          | 9.87976300  | 7.51739800  | 8.76990600  |
| C          | 7.83943900  | 7.58419200  | 9.01483500  |

|    |             |             |             |
|----|-------------|-------------|-------------|
| H  | 7.74445800  | 6.72544600  | 9.40747000  |
| C  | 6.71099600  | 8.40378300  | 8.80368900  |
| H  | 5.84551400  | 8.08560800  | 9.03556600  |
| C  | 6.86102300  | 9.67321100  | 8.25800000  |
| H  | 6.10062900  | 10.23283200 | 8.14766900  |
| C  | 8.10642000  | 10.12645600 | 7.87684100  |
| H  | 8.19365700  | 10.98947900 | 7.48820900  |
| C  | 9.22295500  | 9.34264800  | 8.05371000  |
| H  | 10.07407500 | 9.66475900  | 7.78454000  |
| W  | 7.24606600  | 9.20002900  | 13.02839000 |
| W  | 8.07759400  | 12.24444100 | 11.53624600 |
| W  | 5.72759900  | 12.23404700 | 14.50175000 |
| W  | 10.47731500 | 9.82383800  | 12.18435500 |
| O  | 7.72613300  | 12.26148000 | 15.31219400 |
| O  | 5.81384600  | 14.14943500 | 14.85425400 |
| W  | 11.46993500 | 13.32490300 | 12.91980100 |
| Ru | 9.01043100  | 16.05102100 | 17.48233600 |
| O  | 11.09638300 | 17.48061800 | 15.05717400 |
| O  | 9.28852200  | 17.22843600 | 13.03894700 |
| O  | 8.43357000  | 14.74581000 | 14.20984800 |
| O  | 8.39499800  | 16.82971700 | 15.61520200 |
| O  | 10.17281200 | 15.02525500 | 16.07177100 |
| O  | 7.78349700  | 14.58393700 | 16.68601400 |
| O  | 9.61000700  | 12.53410900 | 17.35784200 |
| O  | 10.36137500 | 12.77947500 | 14.66093200 |
| O  | 12.98557200 | 13.20545800 | 13.78207200 |
| O  | 11.03044600 | 15.09852400 | 13.47906300 |
| O  | 12.02929500 | 13.75412300 | 11.30316300 |
| O  | 5.69813800  | 16.44462800 | 16.45567300 |
| O  | 6.35339500  | 16.65080400 | 13.79715300 |

|    |             |             |             |
|----|-------------|-------------|-------------|
| C  | 8.08924200  | 17.50447300 | 18.78513300 |
| H  | 7.31777100  | 18.04155200 | 18.65164500 |
| C  | 9.35809500  | 17.97475800 | 18.40671600 |
| H  | 9.45307600  | 18.83350400 | 18.01408100 |
| C  | 10.48653800 | 17.15516700 | 18.61786200 |
| H  | 11.35202000 | 17.47334200 | 18.38598500 |
| C  | 10.33651200 | 15.88573900 | 19.16355100 |
| H  | 11.09690500 | 15.32611800 | 19.27388100 |
| C  | 9.09111500  | 15.43249400 | 19.54471000 |
| H  | 9.00387700  | 14.56947100 | 19.93334200 |
| C  | 7.97457900  | 16.21630200 | 19.36784100 |
| H  | 7.12345900  | 15.89419100 | 19.63701100 |
| W  | 9.95146800  | 16.35892100 | 14.39316100 |
| W  | 9.11994100  | 13.31450900 | 15.88530400 |
| W  | 6.72021900  | 15.73511200 | 15.23719600 |
| Ru | 6.80461300  | 7.53137100  | 3.77156000  |
| O  | 8.89056600  | 8.96096800  | 1.34639800  |
| O  | 7.08270500  | 8.70878600  | -0.67182800 |
| O  | 6.22775200  | 6.22616000  | 0.49907200  |
| O  | 6.18918100  | 8.31006700  | 1.90442700  |
| O  | 7.96699500  | 6.50560500  | 2.36099600  |
| O  | 5.57767900  | 6.06428700  | 2.97523800  |
| O  | 7.40418900  | 4.01445900  | 3.64706600  |
| O  | 5.52031600  | 3.74183000  | 1.60141900  |
| O  | 8.15555800  | 4.25982500  | 0.95015700  |
| O  | 10.77975500 | 4.68580800  | 0.07129600  |
| O  | 8.82462900  | 6.57887400  | -0.23171200 |
| O  | 9.82347800  | 5.23447300  | -2.40761200 |
| O  | 3.60802900  | 5.62978500  | 1.14347900  |
| O  | 3.49232000  | 7.92497800  | 2.74489700  |

|    |            |             |             |
|----|------------|-------------|-------------|
| O  | 4.14757800 | 8.13115400  | 0.08637800  |
| C  | 5.88342500 | 8.98482300  | 5.07435800  |
| H  | 5.11195400 | 9.52190200  | 4.94087000  |
| C  | 7.15227800 | 9.45510800  | 4.69594100  |
| H  | 7.24725900 | 10.31385400 | 4.30330500  |
| C  | 8.28072100 | 8.63551700  | 4.90708700  |
| H  | 9.14620300 | 8.95369200  | 4.67521000  |
| C  | 8.13069500 | 7.36608900  | 5.45277500  |
| H  | 8.89108800 | 6.80646800  | 5.56310600  |
| C  | 6.88529700 | 6.91284400  | 5.83393500  |
| H  | 6.79806000 | 6.04982100  | 6.22256700  |
| C  | 5.76876200 | 7.69665200  | 5.65706600  |
| H  | 4.91764200 | 7.37454100  | 5.92623600  |
| W  | 7.74565100 | 7.83927100  | 0.68238500  |
| W  | 6.91412400 | 4.79485900  | 2.17452900  |
| W  | 9.26411800 | 4.80525300  | -0.79097500 |
| W  | 4.51440200 | 7.21546200  | 1.52642100  |
| O  | 7.26558400 | 4.77782000  | -1.60141900 |
| O  | 9.17787100 | 2.88986500  | -1.14347900 |
| W  | 3.52178200 | 3.71439700  | 0.79097500  |
| Ru | 5.98128700 | 0.98827900  | -3.77156000 |
| O  | 3.89533400 | -0.44131800 | -1.34639800 |
| O  | 5.70319500 | -0.18913600 | 0.67182800  |
| O  | 6.55814800 | 2.29349000  | -0.49907200 |
| O  | 6.59671900 | 0.20958300  | -1.90442700 |
| O  | 4.81890500 | 2.01404500  | -2.36099600 |
| O  | 7.20822100 | 2.45536300  | -2.97523800 |
| O  | 5.38171100 | 4.50519100  | -3.64706600 |
| O  | 4.63034200 | 4.25982500  | -0.95015700 |
| O  | 2.00614500 | 3.83384200  | -0.07129600 |

|            |             |             |             |
|------------|-------------|-------------|-------------|
| O          | 3.96127100  | 1.94077600  | 0.23171200  |
| O          | 2.96242200  | 3.28517700  | 2.40761200  |
| O          | 9.29358000  | 0.59467200  | -2.74489700 |
| O          | 8.63832200  | 0.38849600  | -0.08637800 |
| C          | 6.90247500  | -0.46517300 | -5.07435800 |
| H          | 7.67394600  | -1.00225200 | -4.94087000 |
| C          | 5.63362200  | -0.93545800 | -4.69594100 |
| H          | 5.53864100  | -1.79420400 | -4.30330500 |
| C          | 4.50517900  | -0.11586700 | -4.90708700 |
| H          | 3.63969700  | -0.43404200 | -4.67521000 |
| C          | 4.65520500  | 1.15356100  | -5.45277500 |
| H          | 3.89481200  | 1.71318200  | -5.56310600 |
| C          | 5.90060300  | 1.60680600  | -5.83393500 |
| H          | 5.98784000  | 2.46982900  | -6.22256700 |
| C          | 7.01713800  | 0.82299800  | -5.65706600 |
| H          | 7.86825800  | 1.14510900  | -5.92623600 |
| W          | 5.04024900  | 0.68037900  | -0.68238500 |
| W          | 5.87177600  | 3.72479100  | -2.17452900 |
| W          | 8.27149800  | 1.30418800  | -1.52642100 |
| <b>pH7</b> |             |             |             |
| C          | 14.63532700 | 7.70455900  | 1.20761000  |
| H          | 15.49748900 | 7.39486400  | 0.95827500  |
| C          | 14.48188300 | 8.99290100  | 1.76275500  |
| H          | 15.23123600 | 9.56502400  | 1.87593600  |
| C          | 13.19948100 | 9.41101700  | 2.14518700  |
| H          | 13.08602300 | 10.27439400 | 2.52622200  |
| C          | 12.08693500 | 8.58838200  | 1.97795900  |
| H          | 11.22114800 | 8.88602600  | 2.23614900  |
| C          | 12.26772200 | 7.32213500  | 1.42418500  |
| H          | 11.51605400 | 6.74960500  | 1.32160000  |

|    |             |             |             |
|----|-------------|-------------|-------------|
| C  | 13.51075500 | 6.88192300  | 1.02256200  |
| H  | 13.60882900 | 6.02566900  | 0.62194000  |
| O  | 12.46000100 | 6.49100200  | 4.50146700  |
| O  | 14.84898200 | 6.05588900  | 3.87367400  |
| O  | 12.26568100 | 4.23895200  | 5.91331500  |
| O  | 14.91980400 | 3.74775000  | 5.24988400  |
| O  | 14.22329900 | 6.21735600  | 6.34646500  |
| O  | 16.83274800 | 5.63437300  | 5.67069700  |
| O  | 16.93233400 | 7.93741200  | 4.09436100  |
| O  | 16.30011700 | 8.12097500  | 6.75905400  |
| O  | 17.45305400 | 3.27864400  | 4.41236900  |
| O  | 18.46000600 | 3.84803000  | 6.87419500  |
| O  | 11.61824200 | 6.56238700  | 7.10996000  |
| O  | 13.36957300 | 8.69206100  | 7.52940200  |
| O  | 14.22732200 | 8.29604000  | 4.94695300  |
| O  | 11.51366300 | 8.93851200  | 5.51717500  |
| O  | 13.01784000 | 4.00269900  | 3.21709600  |
| Ru | 13.59747000 | 7.51368700  | 3.08674000  |
| W  | 13.50752100 | 4.78896200  | 4.68665200  |
| W  | 16.92707900 | 3.71562700  | 6.03284300  |
| W  | 15.91679900 | 7.20927800  | 5.30553500  |
| W  | 12.68357300 | 7.81588700  | 6.17402700  |
| O  | 15.85534700 | 4.25934800  | 7.79395200  |
| O  | 16.50278600 | 1.93591300  | 6.59730800  |
| W  | 11.19394900 | 4.78267300  | 7.67442500  |
| C  | 13.48570000 | 0.79374100  | 12.49965700 |
| H  | 12.62353900 | 1.10343600  | 12.74899300 |
| C  | 13.63914500 | -0.49460100 | 11.94451300 |
| H  | 12.88979200 | -1.06672400 | 11.83133200 |
| C  | 14.92154700 | -0.91271700 | 11.56208000 |



|    |             |             |             |
|----|-------------|-------------|-------------|
| H  | 15.03500500 | -1.77609400 | 11.18104600 |
| C  | 16.03409200 | -0.09008200 | 11.72930900 |
| H  | 16.89988000 | -0.38772600 | 11.47111900 |
| C  | 15.85330600 | 1.17616500  | 12.28308300 |
| H  | 16.60497400 | 1.74869500  | 12.38566800 |
| C  | 14.61027300 | 1.61637700  | 12.68470500 |
| H  | 14.51219900 | 2.47263100  | 13.08532800 |
| O  | 15.66102700 | 2.00729800  | 9.20580100  |
| O  | 13.27204500 | 2.44241100  | 9.83359400  |
| O  | 13.20122300 | 4.75055000  | 8.45738400  |
| O  | 13.89772900 | 2.28094400  | 7.36080300  |
| O  | 11.28828000 | 2.86392700  | 8.03657100  |
| O  | 11.18869400 | 0.56088800  | 9.61290700  |
| O  | 11.82091000 | 0.37732500  | 6.94821400  |
| O  | 10.66797400 | 5.21965600  | 9.29489800  |
| O  | 9.66102200  | 4.65027000  | 6.83307300  |
| O  | 14.75145500 | -0.19376100 | 6.17786600  |
| O  | 13.89370600 | 0.20226000  | 8.76031500  |
| O  | 16.60736500 | -0.44021200 | 8.19009200  |
| O  | 15.10318800 | 4.49560100  | 10.49017200 |
| Ru | 14.52355800 | 0.98461300  | 10.62052800 |
| W  | 14.61350700 | 3.70933800  | 9.02061600  |
| W  | 12.20422900 | 1.28902200  | 8.40173300  |
| W  | 15.43745400 | 0.68241300  | 7.53324000  |
| C  | 11.18577300 | 9.29204100  | -1.20761000 |
| H  | 10.32361100 | 9.60173600  | -0.95827500 |
| C  | 11.33921700 | 8.00369900  | -1.76275500 |
| H  | 10.58986400 | 7.43157600  | -1.87593600 |
| C  | 12.62161900 | 7.58558300  | -2.14518700 |
| H  | 12.73507700 | 6.72220600  | -2.52622200 |

|    |             |             |              |
|----|-------------|-------------|--------------|
| C  | 13.73416500 | 8.40821800  | -1.97795900  |
| H  | 14.59995200 | 8.11057400  | -2.23614900  |
| C  | 13.55337800 | 9.67446500  | -1.42418500  |
| H  | 14.30504600 | 10.24699500 | -1.32160000  |
| C  | 12.31034500 | 10.11467700 | -1.02256200  |
| H  | 12.21227100 | 10.97093100 | -0.62194000  |
| O  | 13.36109900 | 10.50559800 | -4.50146700  |
| O  | 10.97211800 | 10.94071100 | -3.87367400  |
| O  | 13.55541900 | 12.75764800 | -5.91331500  |
| O  | 10.90129600 | 13.24885000 | -5.24988400  |
| O  | 11.59780100 | 10.77924400 | -6.34646500  |
| O  | 8.98835200  | 11.36222700 | -5.67069700  |
| O  | 8.88876600  | 9.05918800  | -4.09436100  |
| O  | 9.52098300  | 8.87562500  | -6.75905400  |
| O  | 8.36804600  | 13.71795600 | -4.41236900  |
| O  | 7.36109400  | 13.14857000 | -6.87419500  |
| O  | 14.20285800 | 10.43421300 | -7.10996000  |
| O  | 12.45152700 | 8.30453900  | -7.52940200  |
| O  | 11.59377800 | 8.70056000  | -4.94695300  |
| O  | 14.30743700 | 8.05808800  | -5.51717500  |
| O  | 12.80326000 | 12.99390100 | -3.21709600  |
| Ru | 12.22363000 | 9.48291300  | -3.08674000  |
| W  | 12.31357900 | 12.20763800 | -4.68665200  |
| W  | 8.89402100  | 13.28097300 | -6.03284300  |
| W  | 9.90430100  | 9.78732200  | -5.30553500  |
| W  | 13.13752700 | 9.18071300  | -6.17402700  |
| O  | 9.96575300  | 12.73725200 | -7.79395200  |
| O  | 9.31831400  | 15.06068700 | -6.59730800  |
| W  | 14.62715100 | 12.21392700 | -7.67442500  |
| C  | 12.33540000 | 16.20285900 | -12.49965700 |

|    |             |             |              |
|----|-------------|-------------|--------------|
| H  | 13.19756100 | 15.89316400 | -12.74899300 |
| C  | 12.18195500 | 17.49120100 | -11.94451300 |
| H  | 12.93130800 | 18.06332400 | -11.83133200 |
| C  | 10.89955300 | 17.90931700 | -11.56208000 |
| H  | 10.78609500 | 18.77269400 | -11.18104600 |
| C  | 9.78700800  | 17.08668200 | -11.72930900 |
| H  | 8.92122000  | 17.38432600 | -11.47111900 |
| C  | 9.96779400  | 15.82043500 | -12.28308300 |
| H  | 9.21612600  | 15.24790500 | -12.38566800 |
| C  | 11.21082700 | 15.38022300 | -12.68470500 |
| H  | 11.30890100 | 14.52396900 | -13.08532800 |
| O  | 10.16007300 | 14.98930200 | -9.20580100  |
| O  | 12.54905500 | 14.55418900 | -9.83359400  |
| O  | 12.61987700 | 12.24605000 | -8.45738400  |
| O  | 11.92337100 | 14.71565600 | -7.36080300  |
| O  | 14.53282000 | 14.13267300 | -8.03657100  |
| O  | 14.63240600 | 16.43571200 | -9.61290700  |
| O  | 14.00019000 | 16.61927500 | -6.94821400  |
| O  | 15.15312600 | 11.77694400 | -9.29489800  |
| O  | 16.16007800 | 12.34633000 | -6.83307300  |
| O  | 11.06964500 | 17.19036100 | -6.17786600  |
| O  | 11.92739400 | 16.79434000 | -8.76031500  |
| O  | 9.21373500  | 17.43681200 | -8.19009200  |
| O  | 10.71791200 | 12.50099900 | -10.49017200 |
| Ru | 11.29754200 | 16.01198700 | -10.62052800 |
| W  | 11.20759300 | 13.28726200 | -9.02061600  |
| W  | 13.61687100 | 15.70757800 | -8.40173300  |
| W  | 10.38364600 | 16.31418700 | -7.53324000  |

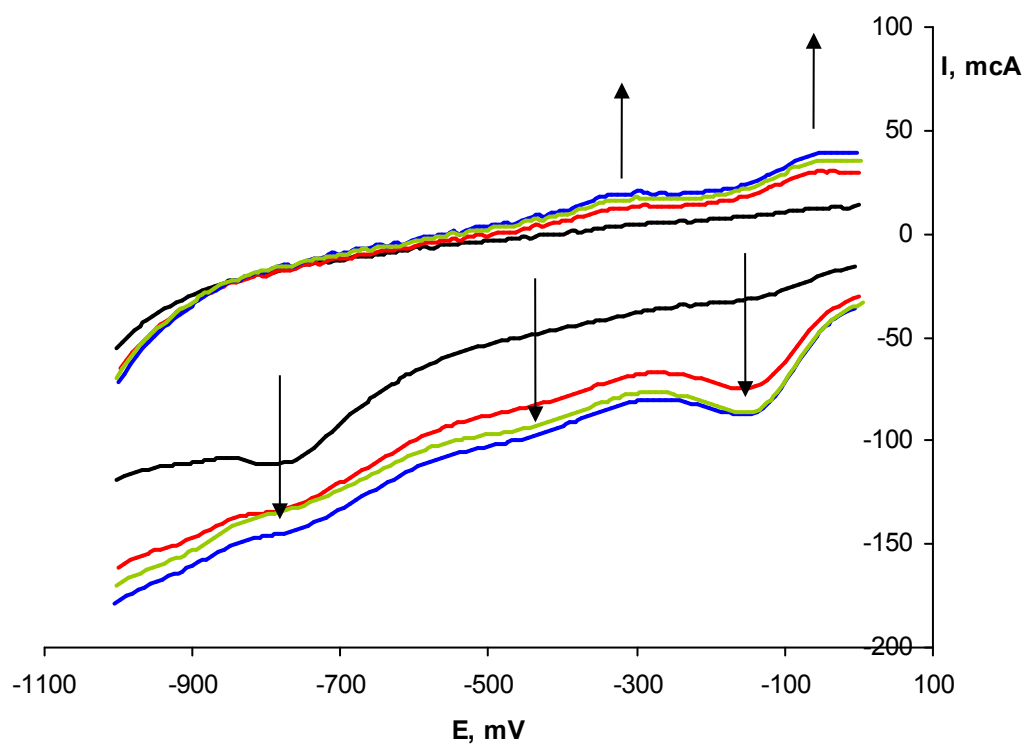

**Fig. S8.** Cathodic region of CV (an aqueous solution of **1** C = 0.008 M) in 0.5 M Li<sub>2</sub>SO<sub>4</sub> at a scan rate of 10 mV/s with the addition of 100 μL of methanol at sequential cycling from 1 to 4 (from black to blue).
